# 1 **ALG-2 interacting protein-X (Alix) is required for activity-dependent bulk** 2 **endocytosis at brain synapses**

3  
4 Marine H. Laporte <sup>1,2,\*</sup>, Kwang Il Chi <sup>1\*</sup>, Marta Rolland <sup>1</sup>, Laura C. Caudal <sup>3</sup>, José Martinez-  
5 Hernandez <sup>1,4</sup>, Magalie Martineau <sup>5</sup>, Christine Chatellard <sup>1,6</sup> Eric Denarier <sup>1</sup>, Vincent Mercier <sup>1,7</sup>,  
6 Florent Lemaître <sup>1,8</sup>, Béatrice Blot <sup>1</sup>, Eve Moutaux <sup>1</sup>, Maxime Cazorla <sup>1</sup>, Alain Buisson <sup>1</sup>, David  
7 Perrais <sup>5</sup>, Sandrine Fraboulet <sup>1,9</sup>, Fabien Lanté <sup>1</sup>, Frank Kirchhoff <sup>3</sup>, Fiona J. Hemming <sup>1</sup>, Rémy  
8 Sadoul <sup>1,6f</sup>

- 9  
10  
11 1) Grenoble Institut Neurosciences, University Grenoble Alpes- INSERM U1216- CEA, Grenoble, France  
12 2) Department of Cell Biology, University of Geneva, Geneva, Switzerland.  
13 3) Molecular Physiology, Center for Integrative Physiology and Molecular Medicine (CIPMM), University of  
14 Saarland, Homburg, Germany.  
15 4) Department of Biochemistry and Molecular Biology, Faculty of Science and Technology, University of  
16 the Basque Country (UPV/EHU), Leioa, Spain.  
17 5) Interdisciplinary Institute for Neuroscience, University of Bordeaux-CNRS UMR 5297, Bordeaux, France  
18 6) Institut de Biologie Structurale, University Grenoble Alpes- CNRS-CEA UMR 5075, Grenoble, France  
19 7) Department of Biochemistry, University of Geneva, Geneva, Switzerland.  
20 8) Département des Neurosciences, Centre de Recherche du centre hospitalier de Montréal, Canada  
21 9) Institute for Advanced Biosciences, Univ. Grenoble Alpes - INSERM U1209 - CNRS UMR 5309, Grenoble,  
22 France

23  
24  
25 \*Equal contribution  
26 <sup>f</sup>Corresponding author  
27 email: [remy.sadoul@univ-grenoble-alpes.fr](mailto:remy.sadoul@univ-grenoble-alpes.fr)

28 **Running title:** Alix and ADBE

29  
30 Number of pages: 44  
31 Items number: 8 figures, 1 table, 2 movies.  
32 Words count: abstract (178), introduction (655), discussion (1364).

## 33 Acknowledgements

34 We thank J. Brocard for helping with data analysis, Y. Saoudi for helping with fluorescence  
35 microscopy, Nicolas Liaudet from the Bioimaging core facility of the University of Geneva for  
36 his help with the segmentation and the electron microscopy, F. Saudou for making the MEA  
37 experiments possible. We also thank K. Sadoul for critically reading the manuscript. This work  
38 was funded by France Alzheimer (R.S.), Ministère de l'Enseignement Supérieur et de la  
39 Recherche (K.I.C, M.R. and M.H.L.), Marie Skłodowska-Curie post-doctoral fellowship (M.M.);  
40 EC H2020 MSCA-ITN EU-GliapHD #722053 (L.C.C. and F.K.), Agence Nationale de la Recherche  
41 ANR (J.M.-H.) and Fondation pour la Recherche Medical FRM (E.M.).

## 42 Competing interests

43  
44 On behalf of all authors R.Sadoul declares no competing interests.

45  
46

47 **Abstract**

48 In chemical synapses undergoing high frequency stimulation, vesicle components can be  
49 retrieved from the plasma membrane via a clathrin-independent process called activity  
50 dependent bulk endocytosis (ADBE). Alix (ALG-2 interacting protein X)/ PDCD6IP is an adaptor  
51 protein binding to ESCRT and endophilin-A proteins and thereby driving deformation and  
52 fission of endosomal and cell surface membranes. In fibroblasts, Alix is required for clathrin-  
53 independent endocytosis. Here, using electron microscopy, we show that synapses from mice  
54 lacking Alix have subtle defects in presynaptic compartments, translating into flawed synaptic  
55 plasticity. Using cultured neurons, we demonstrate that Alix is required for ADBE. We further  
56 demonstrate that in order to perform ADBE, Alix must be recruited to synapses by the calcium-  
57 binding protein ALG-2 and interact with endophilin-A. Finally, we show that mutant mice  
58 lacking Alix in the forebrain undergo less seizures during kainate-induced status epilepticus.  
59 Furthermore, propagation of the epileptiform activity to the contralateral side of kainate  
60 injection is reduced. These results thus highlight Alix ko mice as an invaluable model to study  
61 the exact role of ADBE at synapses undergoing physiological or pathological stimulations.

62

63 **Keywords:** PDCD6IP, Clathrin-independent-endocytosis, Alix knock-out, endophilin-A, ALG-2,  
64 bulk endocytosis, synaptic vesicle recycling, synaptic transmission, calcium, epileptic  
65 seizures.

66

67

68 **List of abbreviations:**

69

70 4AP: 4-Aminopyridine

71 ADBE: Activity-Dependent Bulk Endocytosis

72 ALG-2: Apoptosis Linked Gene 2

73 Alix: ALG-2 Interacting protein X

74 BAPTA: 1,2-Bis(o-AminoPhenoxy)ethane-N,N,N',N'-Tetraacetic Acid

75 BE: Bulk Endosome

76 CA1: Cornu Ammonis 1

77 CA3: Cornu Ammonis 3

78 CHMP4B: Charged Multivesicular body Protein 4B

79 CGN: Cerebellar Granule Neuron

80 CIE: Clathrin-Independent Endocytosis

81 CME: Clathrin-Mediated Endocytosis

82 CTxB: Cholera Toxin chain B

83 DIV: Day *In Vitro*

84 EGTA: Ethylene Glycol-bis( $\beta$ -aminoethyl ether)-N,N,N',N'-Tetraacetic Acid

85 EM: Electron Microscope (Microscopic/ Microscopy)

86 ESCRT: Endosomal Sorting Complexes Required for Transport

87 GABA<sub>A</sub>:  $\gamma$ -AminoButyric Acid type-A

88 GFP: Green Fluorescent Protein

89 HRP: Horse Radish Peroxidase

90 kDa: kiloDalton

91 KO: KnockOut

92 LTP: Long-Term Potentiation

93 N-BAR: N-terminal amphipathic helix- Bin-Amphiphysin-Rvs

94 PRD: Proline-Rich Domain

95 PSD95: Post-Synaptic Density Protein 95

96 ROI: Region of interest

97 SH3: Src Homology 3

98 SV: Synaptic Vesicle

99 Syp-pH: Synaptophysin-pHluorin

100 TSG-101: Tumour Susceptibility Gene-101

101 WT: Wild Type

102 YFP: Yellow Fluorescent Protein

## 103 **Introduction**

104  
105       Neuronal communication in mammalian brain relies heavily on the activity-dependent  
106 release of chemical neurotransmitters from presynaptic boutons. Following fusion of synaptic  
107 vesicles (SV) with the presynaptic membrane, SV lipids and proteins are retrieved by  
108 endocytosis. Endocytosis avoids detrimental increase in the plasma membrane surface and  
109 allows recycling of the SV components to replenish the SV pool (Gan and Watanabe, 2018). At  
110 moderate levels of stimulation, retrieval of membrane involves clathrin-mediated (CME) and  
111 clathrin-independent endocytosis (CIE), in proportions which are still highly debated  
112 (Chanaday and Kavalali, 2018). Moreover, long-lasting high-frequency stimulations also lead  
113 to the clathrin-independent internalization of large stretches of pre-synaptic membranes. This  
114 calcium-dependent process, first discovered at the amphibian neuromuscular junction (Miller  
115 and Heuser, 1984) is referred to as activity-dependent bulk endocytosis (ADBE). It is meant to  
116 avoid abnormal increase of the synaptic bouton surface and to allow replenishment of SVs  
117 during sustained synaptic stimulations (Cheung and Cousin, 2012; Marxen et al., 1999). Thus,  
118 ADBE has been suggested to play key regulatory roles in physiological or pathological events  
119 like epilepsy, which are triggered and sustained by high frequency neuronal activity. However,  
120 decrypting the physiological role of ADBE has been hindered by the lack of identified  
121 molecules that are both specific and essential to this endocytosis mode.

122       We have recently demonstrated that ALG-2 interacting protein-X (Alix) is essential for  
123 clathrin-independent bulk endocytosis in fibroblasts (Mercier et al., 2016). In the adult brain,  
124 Alix is ubiquitously expressed but concentrates at hippocampal pre-synaptic terminals during  
125 epileptic seizures (Hemming et al., 2004). Alix is a cytosolic protein first identified through its  
126 calcium-dependent binding to the penta-EF-hand protein ALG-2 (apoptosis-linked gene  
127 2)(Chatellard-Causse et al., 2002; Missotten et al., 1999; Sadoul, 2006). Since then, it was  
128 reported that following plasma membrane wounds, ALG-2 binds to inflowing calcium and  
129 helps recruiting Alix to the membrane where the latter organizes repair (Scheffer et al., 2014).  
130 Alix interacts with several membrane modifying proteins among which endophilin-A proteins  
131 (A1, A2 and A3) (Chatellard-Causse et al., 2002). These cytoplasmic proteins that contain an  
132 N-BAR (Bin/Amphiphysin/Rvs) domain capable of sensing and generating membrane  
133 curvature (Kjaerulff et al., 2011), are major actors of CME at synapses (Gad et al., 2000;  
134 Ringstad et al., 1999). They also drive CIE in fibroblasts (Boucrot et al., 2014; Renard et al.,

135 2014) and were shown to control the fast mode of CIE at ribbon synapses (Llobet et al., 2011)  
136 as well as in hippocampal neurons (Kononenko et al., 2014; Watanabe et al., 2018).

137 The role of Alix in bulk endocytosis in fibroblasts, its capacity to interact with endophilin-A  
138 and to be recruited by calcium at membranes, together with its increased concentration at  
139 hippocampal synapses during kainate-induced seizures, brought us to test its possible function  
140 in ADBE. For this we made use of Alix ko mice which have normally organized but smaller  
141 brains (Campos et al., 2016; Laporte et al., 2017), a phenotype that we previously linked with  
142 an alteration of CIE in developing neurons (Laporte et al., 2017).

143 We now report that synapse morphology and function are both altered in Alix ko brains.  
144 One obvious feature is their reduced number of synaptic vesicles and increase in size  
145 correlating with impairments in synaptic facilitation and recovery during high frequency  
146 stimulation. Using cultured wt neurons, we bring evidence that sustained synaptic activity  
147 leads to calcium-dependent recruitment of ALG-2. ALG-2 in turn interacts with Alix, which  
148 binds and concentrates endophilin-A. This protein complex is indispensable for ADBE, which  
149 is selectively impaired in Alix ko neurons. Finally, we show that the number of seizures during  
150 status epilepticus induced by intracortical kainate injections is reduced in conditional ko mice  
151 deleted from *alix* in cortical and hippocampal neurons. In addition, the propagation of  
152 epileptiform activity to the contralateral side of injection is reduced. Thus, our results show  
153 that some molecular mechanisms involved in ADBE may also be involved in certain aspects of  
154 synaptic plasticity such as facilitation and accommodation to synaptic fatigue and recurrence  
155 of epileptic seizures.

## 156 **Material and methods**

157

### 158 Plasmids

159 Endophilin A2-mCherry was obtained by subcloning (In-Fusion Cloning kit, Clontech)  
160 endophilin A2 cDNA into a pmCherry-N1 vector (Clontech). GFP-ALG-2 was obtained by  
161 performing a reverse mutagenesis (Quick change II site directed mutagenesis kit, Stratagene)  
162 on a GFP-hALG2 Y180A (a generous gift from Masatoshi Maki) to acquire GFP-hALG2wt. hALG2  
163 E47A-E114A cDNA was kindly provided by Masatoshi Maki (Shibata et al., 2004) and was  
164 subcloned into a pEGFP-C1 vector (Clontech) to obtain GFP-hALG2 E47A-E114A (GFP-  
165 ALG2 $\Delta$ Ca).

166 All constructs containing Alix cDNA (wt or mutants) were obtained by subcloning the relevant  
167 cDNAs from pCI vectors harbouring Alix cDNA or its mutants. Alix I212D (Alix $\Delta$ CHMP4B) and  
168 Alix $\Delta$ PGY (Alix $\Delta$ ALG2) cDNAs in pCI were generated by mutagenesis (Quick change II site  
169 directed mutagenesis kit, Stratagene) and Alix R757E (Alix $\Delta$ endo) by in-fusion cloning, using  
170 the oligos given below.

171 mCherry-2Xflag-mAlix wt (mCherry-Alix) was obtained by subcloning 2xflag-mAlix wt cDNA  
172 into a pmCherry-C1 vector (Clontech). Alix-YFP was obtained by subcloning wild type Alix cDNA  
173 into a pEYFP-N1 vector (Clontech). GFP-flag-Alix (GFP-Alix) was described in (Mercier et al.,  
174 2016). GFP-Alix and its mutant forms (GFP-Alix R757E, GFP-Alix $\Delta$ PGY) were obtained by  
175 subcloning the various cDNAs into a pEGFP-C1 vector (Clontech). DNA constructs used for the  
176 rescue experiments were prepared in two steps. First, IRES2-GFP cDNA was subcloned into  
177 pSIN lentiviral vector (kindly provided by F. Saudou) by using pIRES2-GFP (Clontech) as a  
178 template. Then the various cDNAs were subcloned into pSIN-IRES2-GFP.

179 Oligos used to generate mutants:

180 Alix I212D

181 sense: 5'-AAGATGAAAG ATGCCGACAT AGCTAAGCTG-3'

182 antisense: 5'-CAGCTTAGCT ATGTCGGCAT CTTTCATCTT -3'

183 Alix R757E

184 sense: 5'-CAGCCGAGCC TCCACCTCCT GTGCTTCCTG -3'

185 antisense: 5'-GAGGCTCGGC TGGAGGCTGG GGCTTAGCAG-3'

186 Alix $\Delta$ PGY

187 sense: 5'-GCCACAGGCT CAGGGATGCC AAATGCCCAT GC-3'

188 antisense: 5'-GCATGGGCAT TTGGCATCCC TGAGCCTGTG GC -3'.

189 Antibodies

190

| Antibody                                | Supplier (reference)                 | Species (type)        | Dilution |
|-----------------------------------------|--------------------------------------|-----------------------|----------|
| Anti-Actin                              | Millipore (MAB1501R)                 | Mouse<br>(monoclonal) | 1/10000  |
| Anti-Alix                               | Covalab (ab0204)                     | Rabbit (polyclonal)   | 1/10000  |
| Anti-phospho-p44/42<br>MAPK (T202/Y204) | Cell signaling (9106)                | Mouse<br>(monoclonal) | 1/1000   |
| Anti-PSD95                              | NeuroMab (73-028)                    | Mouse<br>(monoclonal) | 1/2000   |
| Anti-PSD95                              | Millipore (MAB1598)                  | Mouse<br>(monoclonal) | 1/500    |
| Anti-Synapsin-1                         | Millipore (AB1543P)                  | Rabbit (polyclonal)   | 1/1000   |
| Anti-Synaptophysin                      | Merck Millipore (MAB5258)            | Mouse<br>(monoclonal) | 1/5000   |
| Anti-Flag                               | Sigma-Aldrich (F3165)                | Mouse<br>(monoclonal) | 1/1000   |
| Anti-Flag                               | Sigma-Aldrich (F7425)                | Rabbit (polyclonal)   | 1/1000   |
| Anti-Mouse HRP                          | Jackson ImmunoResearch (115-035-166) | Goat (polyclonal)     | 1/5000   |
| Anti-Rabbit HRP                         | Jackson ImmunoResearch (115-035-044) | Goat (polyclonal)     | 1/5000   |
| Anti-Mouse Alexa Fluor 488              | Invitrogen (A-11029)                 | Goat (polyclonal)     | 1/1000   |
| Anti-Mouse Alexa Fluor 594              | Invitrogen (A-11032)                 | Goat (polyclonal)     | 1/1000   |
| Anti-Mouse Cy5                          | Jackson ImmunoResearch (115-175-146) | Goat (polyclonal)     | 1/500    |
| Anti-Rabbit Alexa Fluor 488             | Invitrogen (A-11034)                 | Goat (polyclonal)     | 1/1000   |
| Anti-Rabbit Alexa Fluor 594             | Invitrogen (A-11037)                 | Goat (polyclonal)     | 1/1000   |
| Anti-Rabbit Cy5                         | Jackson ImmunoResearch (111-175-144) | Goat (polyclonal)     | 1/1000   |

191

192 Animals

193 Animals were handled and killed in conformity with European law and internal regulations of  
194 INSERM. Pregnant Oncins France souche A (OFA; a substrain of Sprague Dawley) rats (Charles  
195 River) were used for rat neuronal cultures. Alix ko C57BL/6 mouse pups (Laporte et al., 2017;

196 Mercier et al., 2016) and their control littermates referred to thereafter as Alix wt, were also  
197 used for primary neuronal culture. Transgenic mice were held at the animal facility of the  
198 Grenoble Institute for Neurosciences and fed *ad libitum*. All animals were held at a twelve-  
199 hour light/dark cycle. One to two month-old Alix wt and Alix ko mice were used for  
200 electrophysiological recordings, histochemistry and electron microscopy studies.

201 Mice were anesthetized by intraperitoneal injection of 0.1 ml sodium pentobarbital (5.6% w/v;  
202 CEVA Santé Animale) and treated as described in the corresponding sub-headings of the  
203 material and methods section.

204  $Emx1^{IREScre}/Alix^{fl/fl}$  and  $Emx1^{IREScre}$  control mice were used for the kainate injection epilepsy  
205 model. 8-11 weeks old mice were anesthetized under a mixture of 2 % isoflurane, 47.5 % O<sub>2</sub>  
206 and 47.5 % N<sub>2</sub>O. Transgenic mice were held at the animal facility of the CIPMM and fed *ad*  
207 *libitum*. All animals were held at a twelve-hour light/dark cycle. This study was carried out in  
208 strict accordance with the European and German guidelines for the welfare of experimental  
209 animals. Animal experiments were approved by the Saarland state's "Landesamt für  
210 Gesundheit und Verbraucherschutz" animal licence number 36/2016.

211

## 212 Golgi staining

213 2-month-old anesthetized mice were dislocated prior to brain dissection and 100 µm thick  
214 coronal brain sections were cut on a vibratome in the hippocampal region. The dendritic  
215 spines of hippocampal neurons from the CA1 *stratum radiatum* were visualized by the Golgi  
216 impregnation technique. For this, we used the FD Rapid GolgiStain kit (FD NeuroTechnologies).  
217 Brain sections were immersed in equal volumes of solutions A and B for 7 d and impregnated  
218 with solution C for 48 h at 4°C. Then, the sections were washed twice in double-distilled water  
219 and incubated for 10 min in a mixture of one part of solution D, one part of solution E, and  
220 two parts of double-distilled water. Sections were washed twice, dehydrated with increasing  
221 concentrations of ethanol, and mounted with epoxy resin (Fluka) between two coverslips.  
222 Stacks of bright-field images with 0.3 µm spacing were acquired with a Zeiss Axioskop 50  
223 microscope with 63x oil objective (NA 1.4; Plan-Apochromat) coupled to a CCD camera  
224 (CoolSnap ES; Roper Scientific) operated by Metaview software (Molecular Devices). Images  
225 were analysed with ImageJ. The number of dendritic spines (>1 µm protrusion of 100 µm  
226 portions of dendrite) per unit dendritic length was counted with ImageJ.

227



## 228 Transmission electron microscopy of the CA1 hippocampus

229 2-month-old, anesthetized mice were intracardially perfused with phosphate-buffered 0.9%  
230 NaCl (PBS), followed by 0.1 M phosphate buffered 4% paraformaldehyde, pH 7.4,  
231 supplemented with 0.05% glutaraldehyde (Sigma). The brains were carefully removed,  
232 postfixed for 4 h in the same fixative and 60  $\mu\text{m}$  sections were cut with a vibratome. After  
233 several washes in PBS, the sections were postfixed in 1% glutaraldehyde in the same buffer  
234 for 10 min and processed for EM. This included treatment with osmium tetroxide (1% in 0.1  
235 M PB), block staining with uranyl acetate, dehydration through a graded series of ethanol, and  
236 flat embedding on glass slides in Durcupan (Fluka) resin. Regions of interest were cut at 70 nm  
237 on an ultramicrotome (Reichert Ultracut E; Leica) and collected on one-slot copper grids.  
238 Staining was performed on drops of 1% aqueous uranyl acetate, followed by Reynolds's lead  
239 citrate. EM images were acquired in a JEOL-1200 electron microscope with a digital camera  
240 (Veleta, SIS; Olympus) and analysed with ImageJ. Twenty images per animal from 3 animals  
241 per genotype were used for quantification. The number of synapses per  $\mu\text{m}^2$  was calculated.  
242 A synapse was considered if it met 3 criteria: a presynaptic bouton filled with at least 10  
243 synaptic vesicles (1) juxtaposed to the head of a dendritic spine with a clearly visible PSD (2)  
244 and the presence of the neck in the section (3). Number of synaptic vesicles and areas of  
245 presynaptic boutons were quantified in each synapse using the free-shape tool and the cell  
246 counter plugins of ImageJ. We used the straight tool of ImageJ to measure the lengths of PSDs,  
247 and head and neck diameters. Note that the head diameter was taken parallel to the PSD and  
248 the neck diameter was perpendicular to the neck membranes.

249

## 250 Electrophysiological recordings in CA1

251 *Ex vivo slice preparation:* Brain slices were prepared from 2-month-old C57BL/6 wt and Alix ko  
252 mice. The brains were removed quickly and 350  $\mu\text{m}$ -thick sagittal slices containing both cortex  
253 and hippocampus were cut in ice-cold sucrose solution (2.5 mM KCl, 1.25 mM  $\text{NaH}_2\text{PO}_4$ , 10  
254 mM  $\text{MgSO}_4$ , 0.5 mM  $\text{CaCl}_2$ , 26 mM  $\text{NaHCO}_3$ , 234 mM sucrose, 11 mM glucose, saturated with  
255 95%  $\text{O}_2$  and 5%  $\text{CO}_2$ ) with a Leica VT1200 blade microtome (Leica Microsystems, Nanterre,  
256 France). After cutting, hippocampi were extracted from the slice and transferred to  
257 oxygenated Artificial Cerebro-Spinal Fluid (ACSF: 119 mM NaCl, 2.5 mM KCl, 1.25 mM  $\text{NaH}_2\text{PO}_4$ ,  
258 1.3 mM  $\text{MgSO}_4$ , 2.5 mM  $\text{CaCl}_2$ , 26 mM  $\text{NaHCO}_3$ , 11 mM glucose) at  $37 \pm 1^\circ\text{C}$  for 30 min and  
259 then kept at room temperature for at least 1 h before recordings. Each slice was individually

260 transferred to a submersion-type recording chamber and continuously superfused (2 ml/min)  
261 with oxygenated ACSF. Extracellular recordings were obtained at 28°C from the apical  
262 dendritic layers of the hippocampal CA1 area, using glass micropipettes filled with ACSF. Field  
263 excitatory postsynaptic potentials (fEPSPs) were evoked by the electrical stimulation of  
264 Schaffer collaterals afferent to CA1. The magnitude of the fEPSPs was determined by  
265 measuring their slope. Signals were acquired using a double EPC 10 Amplifier (HEKA Elektronik  
266 Dr. Schulze GmbH, Germany) and analysed with Patchmaster software (HEKA Elektronik Dr.  
267 Schulze GmbH, Germany).

268 *Input/output*: The slope of fEPSPs was plotted as a function of stimulation intensity (30 to 60  
269  $\mu$ A).

270 *Paired-pulse facilitation (PPF)*: PPF of synaptic transmission was induced by paired-pulse  
271 stimulation with an inter-stimulus interval of 50 ms. PPF was quantified by normalising the  
272 second response to the first one.

273 *Frequency facilitation*: Schaffer collaterals were stimulated repetitively by 25 stimuli of the  
274 same intensity at 25Hz.

275 *Long-term potentiation*: Test stimuli were delivered once every 15 s. Stimulus intensities were  
276 adjusted to produce 40-50% of the maximal response. A stable baseline was recorded for at  
277 least 15 min. LTP was induced by high frequency stimulation (4 trains delivered at 100 Hz with  
278 5 min between each train). Average value of fEPSP slope was expressed as a percentage of the  
279 baseline response.

280

### 281 EEG telemetry and unilateral intracortical kainate injection

282 We took advantage of the unilateral intracortical kainate injection model for human temporal  
283 lobe epilepsy. Telemetric EEG transmitter implantation, kainate injection and data analysis  
284 was adapted from Bedner and colleagues (Bedner et al., 2015).

285 Alix<sup>fl/fl</sup> mice (Laporte et al., 2017) with heterozygous cre expression (Emx1<sup>IREScree</sup> (Emx<sup>tm1(cre)Krlj</sup>,  
286 MGI: 2684610)(Gorski et al., 2002)) as well as control mice (Alix<sup>fl/fl</sup> x Emx<sup>wt</sup>) were implanted  
287 with telemetric EEG transmitters (DSI PhysioTel® ETA-F10, Harvard Biosciences, Inc. Holliston,  
288 Massachusetts, USA) between 8 and 11 weeks of age. The animals were placed in a stereotaxic  
289 frame (Robot stereotaxic, Neurostar, Tübingen, Germany) for implantation of depth  
290 electrodes at 3.4 mm posterior to bregma and bilaterally 1.6 mm from the sagittal suture.  
291 After post-surgical care and recovery, mice were again placed in the stereotaxic frame and

292 injected with 70 nl of a 20 mM solution of kainate (Tocris, Wiesbaden-Nordenstadt, Germany)  
293 in 0.9% NaCl, above the right dorsal hippocampus (1.9 mm posterior to bregma, 1.5 mm from  
294 sagittal suture and 1.3 mm from skull surface). Kainate was injected at a rate of 70 nl/ min  
295 with a 10 µl Nanofil syringe (34 GA blunt needle, World Precision Instruments, Sarasota, FL,  
296 USA). The syringe was kept in place for 2 min after the injection was completed to avoid liquid  
297 reflux.

298 Cages were placed on individual radio receiving plates (DSI PhysioTel® RPC-1, Data Sciences  
299 International, St. Paul, USA), which record EEG signals and sent them, together with the video  
300 recording (MediaRecorder Software, Noldus Information Technology, Wageningen,  
301 Netherlands), to an input exchange matrix (DSI PhysioTel® Matrix 2.0 (MX2), Ponemah  
302 software, DSI, Data Sciences International, St. Paul, USA). The animals were monitored for at  
303 least 20 h post kainate injection. In our model the mortality rate associated to *status*  
304 *epilepticus* is less than 5% in more than 50 mice with different genetic backgrounds over the  
305 last 12 months.

### 306 **Immunohistochemistry**

307 Free-floating vibratome sections (40 µm) were incubated for one hour in blocking buffer  
308 (5 % HS, 0.3 % Triton X in 1x PBS) at room temperature. Sections were incubated with  
309 primary antibodies (rabbit@Iba1 [1:500], Wako; goat@GFAP [1:1000], Abcam) diluted in  
310 blocking solution, overnight at 4°C. Secondary antibodies (Alexa546@rabbit [1:1000];  
311 Alexa488@goat [1:1000], Invitrogen) and DAPI (0.025 µg/ml, Sigma) were diluted in blocking  
312 buffer and incubated for 2 h at room temperature.

313 *Data analysis:* EEG traces were analysed with the Neuroscore software (Version 3.3.1., Data  
314 Sciences International, St. Paul, USA). Electrographic seizures were detected with the spike  
315 detection protocol. Subsequently, an additional manual screen was employed to remove  
316 artifacts that were eventually picked up. Seizures were characterized by high frequency  
317 spiking and ceased with a postictal depression (flattening of EEG). Seizure detection was  
318 complemented by synchronized video monitoring. Electrographic seizures were associated  
319 with behavioural analogues of Racine stages II-V (Racine, 1972). The total duration of *status*  
320 *epilepticus* was defined from the first electrographic seizure to the first seizure free period  
321 lasting 1 h. Statistical analysis was performed with GraphPad Prism.

322

### 323 Cell culture and transfection

324 Cortical and hippocampal neurons from rat E18 embryos and P0 Alix wt and ko mice were  
325 prepared as previously described (Faure et al., 2006). Briefly, cortices and hippocampi were  
326 dissected from E18 rat embryos or P0 mouse pups, treated with trypsin, and mechanically  
327 dissociated. Dissociated cells were seeded at a density of  $5 \times 10^4/\text{cm}^2$  in 100 mm dishes for  
328 cortical neurons and  $1.5 \times 10^4/\text{cm}^2$  onto acid-washed coverslips (either 14 mm diameter or 25  
329 mm; Marienfeld) in either 4-well plates or P35 dishes (ThermoScientific) precoated for 4 h  
330 with 50  $\mu\text{g}/\text{ml}$  poly-D-lysine (Sigma). Neurons were maintained in neuronal culture medium  
331 (Neurobasal medium containing 2% B27 supplement, 10 unit/mL penicillin, 10  $\mu\text{g}/\text{mL}$   
332 streptomycin, and 0.5 mM L-glutamine; Invitrogen) supplemented with 10% heat-inactivated  
333 horse serum (Invitrogen). Neurons were maintained in water-saturated 95% air/5%  $\text{CO}_2$  at  
334 37°C. The seeding medium was replaced after 20 h with serum-free neuronal culture medium.

335 Neurons were transfected at 10 DIV as previously described (Chassefeyre et al., 2015). Briefly,  
336 for each P35 dish, 2  $\mu\text{g}$  plasmid DNA, 250 mM  $\text{CaCl}_2$  were mixed with an equal volume of 2x  
337 BES-buffered saline and left to precipitate for 20 min at room temperature. Neurons were  
338 placed in transfection medium (Minimum Essential Medium containing 0.22%  $\text{NaHCO}_3$ , 20 mM  
339 D-glucose and 0.5 mM L-glutamine) supplemented with 2% B27, before the DNA precipitate  
340 was added. They were then incubated for 1.5 h at 37°C and 5%  $\text{CO}_2$ . Neurons were then  
341 washed by being placed in transfection medium (pre-warmed to 37°C in 10%  $\text{CO}_2$ ) for 20 min  
342 at 37°C and 5%  $\text{CO}_2$ . Finally, they were transferred back into their conditioned medium.

343 Primary cultures of cerebellar granule neurons (CGN) were prepared from 6-day-old C57BL/6  
344 Alix wt and Alix ko pups as described previously (Trioulier et al., 2004), with some

345 modifications. The cerebella were removed, cleared of their meninges, and cut into 1-mm  
346 pieces. They were then incubated at 37°C for 10 min in 0.25% trypsin-EDTA and DNase (1500  
347 U/mL). Trypsin was inactivated and cells were dissociated in culture medium (DMEM  
348 containing 10% fetal bovine serum, 2 mM L-glutamine, 25 mM KCl, 10 mM HEPES and 10  
349 unit/ml penicillin, 10 µg/ml streptomycin). After filtration on 70 µm cell strainers, neurons  
350 were plated at  $5 \cdot 10^5$  cell/cm<sup>2</sup> onto poly-D-lysine (10 µg/ml, Sigma) precoated coverslips.  
351 Cytosine-β-D-arabinoside (10 µM, Sigma) was added after 1 day in vitro (DIV), to prevent the  
352 growth of non-neuronal cells, until 8 DIV when neurons were used for activity dependent bulk  
353 endocytosis experiment (see below).

354

### 355 Multi-electrode array

356 Dissociated hippocampal neurons were resuspended in neuronal medium and plated at a 10<sup>6</sup>  
357 cells/cm<sup>2</sup> on poly-L-lysine-coated multi-electrode arrays comprising 59 extracellular recording  
358 electrodes and one reference electrode (MEA-60 Multichannel Systems, MCS). Electrodes  
359 were 30 µm in diameter and separated by a distance of 200 µm. MEA-60 plates were  
360 connected to a 60-channel data acquisition system (USB-MEA64) and associated amplifier  
361 (MEA1060-Inv-BC) powered by a PS40W power supply system (MCS, Germany). The recording  
362 system was then placed in a humidified incubation chamber at 37°C and 5% CO<sub>2</sub>. Neurons  
363 were left for 5 min to equilibrate before recording. Basal spontaneous activity was recorded  
364 for 3 min prior addition of drugs. Bicuculline (100 µM) and 4-aminopyridine (5 mM) were then  
365 added and neuronal activity recorded for another 10 min. Signals were recorded with a 1100  
366 gain, sampled at 20 kHz and analyzed with MC Rack software (MCS, Germany). Raw signals  
367 were first filtered with a Butterworth band pass filter (2nd order) between 200 and 800 Hz to  
368 remove electrical noise and low frequency signals. Spike detection analysis was performed on  
369 filtered signals using a threshold of 6 standard deviations to mark out action potentials. Burst  
370 events were identified as a minimum of 5 consecutive spikes with an interspike interval lower  
371 than 100 ms. The minimum interval time between two bursts was fixed at 1000 ms.  
372 Representative traces were exported using custom-made Matlab functions (Matlab 2014b).

373

### 374 Imaging of synaptophysin-pHluorin upon electrical stimulation

375 Hippocampal neurons from Alix wt and ko mice were transfected with synaptophysin-pHluorin  
376 (Syp-pH) at 6 DIV by a calcium phosphate transfection procedure. The recycling of synaptic

377 vesicles was imaged in a buffer solution containing 120 mM NaCl, 5 mM KCl, 2 mM CaCl<sub>2</sub>, 2  
378 mM MgCl<sub>2</sub>, 5 mM glucose, 10 mM HEPES adjusted to pH 7.4 and 270 mOsm/l. Experiments  
379 were carried out at 34°C. Neurons were stimulated by electric field stimulation (platinum  
380 electrodes, 10 mm spacing, 1 ms pulses of 50 mA and alternating polarity at 5-40 Hz) applied  
381 by a constant current stimulus isolator (SIU-102, Warner Instruments). The presence of 10 μM  
382 6-cyano-7-nitroquinoxaline-2,3-dione (CNQX) and 50 μM D,L-2-amino-5-phosphonovaleric  
383 acid (AP5) prevented recurrent activity.

384 Experiments were performed on an inverted microscope (IX83, Olympus) equipped with an  
385 Aplanachromat N oil 100× objective (NA 1.49). Images were acquired with an electron multiplying  
386 charge coupled device camera (QuantEM:512SC; Roper Scientific) controlled by MetaVue7.1  
387 (Roper Scientific). Samples were illuminated by a 473-nm laser (Cobolt). Emitted fluorescence  
388 was detected after passing a 525/50 nm filter (Chroma Technology Corp.). Time-lapse images  
389 were acquired at 1 or 2 Hz with integration times from 50 to 100 ms.

390 Image analysis was performed with custom macros in Igor Pro (Wavemetrics) using an  
391 automated detection algorithm as described previously (Martineau et al., 2017). The image  
392 from the time series showing maximum response during stimulation was subjected to an “à  
393 trous” wavelet transformation. All identified masks and calculated time courses were visually  
394 inspected for correspondence to individual functional boutons. The intensity values were  
395 normalized to the ten frames before stimulation.

396

### 397 Live Fluorescence Imaging of Alix and endophilin recruitment to synapses

398 For live imaging of protein recruitment, cultured hippocampal neurons were co-transfected  
399 with Alix-mCherry or endophilin-A2-mCherry together with Syp-pH expression vectors 2 to 4  
400 days prior to imaging. All live imaging experiments were performed at 37°C and images were  
401 acquired using a spinning disk confocal microscope (AxioObserver Z1) with a 63x oil objective  
402 (NA 1.46, Zeiss) at 488 nm and 561 nm excitation. Transfected neurons were placed in basal  
403 medium for 10 min and then mounted in an imaging chamber (POC-R2 Cell cultivation system,  
404 Zeiss). Imaging lasted 12 min and consisted of 2 min in basal medium, 5 min in bicuculline/4AP  
405 solution and 5 min in basal medium. A 5x bicuculline/4AP solution was added (final  
406 concentration, 100 μM and 5 mM, respectively) for stimulation which lasted 5 min and the  
407 chamber was perfused with basal medium at 3 ml/min for washing. ROI were drawn on  
408 ‘presynapses’ defined by spots of synaptophysin-pHluorin that increased during stimulation.



409 For both synaptophysin-pHluorin and mCherry-Alix, fluorescence values were measured in  
410 these ROI and then normalised to the initial fluorescence values (fluorescence values prior to  
411 stimulation) using ImageJ.

412

### 413 Immunofluorescence

414 Cultured hippocampal neurons were fixed for 20 min at room temperature in phosphate-  
415 buffered 4% paraformaldehyde supplemented with 4% sucrose. After three washes in PBS,  
416 cells were permeabilized and blocked in PBS containing 0.3% Triton X-100 and 3% BSA for 15  
417 min at room temperature. Coverslips were incubated for 1–2 h at room temperature with  
418 primary antibodies diluted in the blocking solution. After washing in PBS, cells were incubated  
419 for 1 h with secondary antibodies conjugated to Alexa Fluor 488, Alexa Fluor 594, or Cyanine  
420 5 (Cy5), diluted in the blocking solution. Coverslips were rinsed and mounted in Mowiol.  
421 Images were acquired on a Leica SPE microscope using a 40x dry objective (NA 0.75, Leica) or  
422 a 100x oil immersion objective (NA 1.4, Leica) at 488 nm, 532 nm or 635 nm.

423 *Synapse density*: Cultured hippocampal neurons were fixed and stained with antibodies at 14-  
424 16 DIV as described above. Presynaptic boutons (synapsin-1-positive) and postsynaptic  
425 terminals (PSD95-positive) were selected using the Spot Detector plugin in Icy software  
426 (de Chaumont et al., 2012) (wavelet detection with size filtering between 0.4  $\mu\text{m}$  and 2  $\mu\text{m}$  in  
427 diameter) on max image projections. Synapses were defined as spots of colocalization  
428 between the detected presynaptic and postsynaptic terminals that were within 3  $\mu\text{m}$  of each  
429 other. Synapses were counted using the Colocalization Studio in ICY software (Lagache et al.,  
430 2018)

431 *Protein recruitment assays*: Cultured hippocampal neurons were transfected with expression  
432 vectors 24~48 h prior to stimulation. The transfected neurons were incubated in basal  
433 medium (150 mM NaCl, 5 mM KCl, 1.3 mM  $\text{CaCl}_2$ , 10 mM HEPES and 33 mM D-glucose at pH  
434 7.4) for 10 min prior to stimulation. Coverslips were either treated with basal medium alone  
435 or bicuculline/4AP solution (basal medium supplemented with 100  $\mu\text{M}$  bicuculline and 5 mM  
436 4-aminopyridine) for 5 min at 37°C and 5%  $\text{CO}_2$ . Coverslips were fixed and stained with  
437 antibodies against synapsin-1 and PSD95 as described above. Images were acquired on a Leica  
438 SPE microscope using a 100x oil immersion objective (NA 1.4, Leica) at 488 nm, 532 nm or 635  
439 nm. The acquired images were analysed using ImageJ. Regions of interest (ROI) were drawn  
440 on areas of axons which colocalize with anti-synapsin-1 spots, but not with anti-PSD95 spots

441 to ensure presynaptic measurement. Fluorescence intensities were then measured in these  
442 ROI and normalised to fluorescence intensities measured on other regions of axons to give the  
443 relative fluorescence intensity at presynaptic boutons.

444

#### 445 Quantification of calcium increase during stimulation

446 Hippocampal neurons cultured on 24-well plates were placed in basal medium and incubated  
447 with 1  $\mu$ M Fluo-4-AM for 1 h at 37°C. After washing, neurons were left in 250  $\mu$ l basal medium  
448 for 5 min. Plates were then transferred to a Pherastar automatic plate reader (BMG Labtech,  
449 Germany) set to 37 °C, to record fluorescence intensity at 0.1 Hz during 590 s, for each well,  
450 and with fluorescence measurement settings as described on  
451 <http://www.bmglabtech.com/media/35216/1043854.pdf>. Neurons were stimulated with 50  
452  $\mu$ l 6x bicuculline/4AP solution (final concentration, 100  $\mu$ M and 5 mM, respectively) after 290  
453 s with automatic injection.

454

#### 455 Quantification of ADBE by dextran uptake

456 The protocol for dextran uptake was adapted from (Clayton and Cousin, 2009b). 15-17 DIV  
457 hippocampal neurons were stimulated with bicuculline/4AP solution for 5 min, at 37°C and 5%  
458 CO<sub>2</sub>, in the presence of 10 kDa tetramethylrhodamine-dextran (50  $\mu$ M). Coverslips were  
459 immediately washed several times in washing solution (basal medium supplemented with 0.2%  
460 BSA and warmed to 37°C) to remove excess dextran. For ADBE inhibition, neurons were  
461 stimulated in the presence of 2  $\mu$ M GSK3 inhibitor (CT99021, Tocris) and placed in fresh basal  
462 medium containing 2  $\mu$ M GSK3 inhibitor for 10 min at 37°C and 5% CO<sub>2</sub>. Neurons were then  
463 fixed as previously described and imaged with a Leica SPE microscope using a 40x dry  
464 immersion objective (NA 0.75, Leica) at 532 nm excitation. Analysis was performed on ImageJ.  
465 The number of fluorescent spots was counted in a defined field of view (130 $\mu$ m x 130  $\mu$ m) in  
466 thresholding analysis with a diameter limit between 300 nm and 2  $\mu$ m (resolution limit for the  
467 microscope and maximum size of a nerve terminal).

468 *Rescue experiments:* Cultured hippocampal neurons were transfected 2 to 4 d prior to the day  
469 of experiment. Dextran uptake assay was performed as described above. Images were  
470 acquired on a Leica SPE microscope using a 40x oil immersion objective (NA 1.25, Leica) at 488  
471 nm and 532 nm excitation. The analysis was performed on ICY software. ROI were generated  
472 closely around axons by using 'thresholder'. Then dextran spots within these ROI were



473 counted by using 'spot detector' with size limit between 300 nm and 2  $\mu$ m. The length of axon  
474 per field of view was estimated by manually drawing 'Polyline type ROI' over the axon images.  
475 The number of dextran spots per  $\mu$ m of axon was calculated and expressed as ratio to control  
476 values.

477

#### 478 EM examination of ADBE in culture neurons

479 Analysis of ADBE from cerebellar granule neurons was performed as described previously with  
480 some modifications (Cheung et al., 2010). 8 DIV CGN were pre-incubated in hyperpolarizing  
481 medium (170 mM NaCl, 3.5 mM KCl, 0.4 mM KH<sub>2</sub>PO<sub>4</sub>, 20 mM TES, 5 mM NaHCO<sub>3</sub>, 5 mM D-  
482 glucose, 1.2 mM Na<sub>2</sub>SO<sub>4</sub>, 1.2 mM MgCl<sub>2</sub>, 1.3 mM CaCl<sub>2</sub>, pH7.4) for 10 min prior to stimulation.  
483 Neurons were then incubated for 2 min with 10 mg/ml HRP (Sigma P8250) in either the  
484 hyperpolarizing medium or a high-potassic solution containing 50 mM KCl (123.5 mM NaCl, 50  
485 mM KCl, 0.4 mM KH<sub>2</sub>PO<sub>4</sub>, 20 mM TES, 5 mM NaHCO<sub>3</sub>, 5 mM D-glucose, 1.2 mM Na<sub>2</sub>SO<sub>4</sub>, 1.2  
486 mM MgCl<sub>2</sub>, 1.3 mM CaCl<sub>2</sub>, pH7.4) before rapid washing in PBS and fixation in PBS-  
487 glutaraldehyde 2% for 30 min. After three washes in Tris buffer 100 mM, endocytosed HRP  
488 was revealed by incubation in Tris 100 mM containing 0.1% diaminobenzidine and 0.2% H<sub>2</sub>O<sub>2</sub>.  
489 The cultures were then post-fixed in 1% osmium tetroxide, dehydrated and embedded in Epon.  
490 Synapses were photographed with a JEOL-1200 electron microscope. Quantification was  
491 performed as follows: HRP-positive structures were quantified per synapse and classified as  
492 synaptic vesicles when the diameter was less than 100 nm and as bulk endosome when the  
493 diameter was more than 100 nm.

494 For focused ion beam scanning electron microscopy (FIB-SEM), the block was mounted on a  
495 pin, coated with gold, and inserted into the chamber of a HELIOS 660 Nanolab DualBeam  
496 SEM/FIB microscope (FEI Co., Eindhoven, The Netherlands). Region of interest (ROI) was  
497 prepared using focused ion beam (FIB) and ROI set to be approximately 15  $\mu$ m wide. During  
498 the acquisition process, the image acquisition parameters of the electron beam were 2 kV and  
499 0.4 nA and the thickness of the FIB slice between each image acquisition was 10 nm. The  
500 segmentation of the synapse and ADBE was done with Amira software (Thermo Fisher  
501 Scientist) and the movie obtained using Imaris (Oxford Instruments).

502

#### 503 Synaptosomal preparation from cortical neurons

504 Synaptosome-enriched membranes from 15 DIV cortical neurons were prepared as described

505 previously with some modifications (Frandemiche et al., 2014). Briefly, cultured neurons were  
506 stimulated for 15 min with a mixture of bicuculline/4AP (50  $\mu$ M/2.5 mM). After a wash in HBSS,  
507 neurons were homogenized by passing 15-20 times through 0.25G needle in cold buffer  
508 containing 0.32 M sucrose, 10 mM HEPES, 15mM NaF, 15mM  $\beta$ -glycerophosphate and  
509 protease inhibitors (Roche), pH 7.4. Samples were maintained at 4°C during all steps of the  
510 experiment. Homogenates were cleared at 1000g for 10 min to remove nuclei and large debris.  
511 The resulting supernatants were spun down at 12,000 g for 20 min to obtain a crude  
512 membrane fraction and washed twice in HEPES buffer 4 mM containing 1 mM EDTA, 15 mM  
513 NaF, 15 mM  $\beta$ -glycerophosphate and protease inhibitors (Roche), pH 7.4. The resulting pellet  
514 was solubilized in 0.5% Triton X-100, 20 mM HEPES, 100 mM NaCl, 15mM NaF, 15 mM  $\beta$ -  
515 glycerophosphate, pH 7.2, containing protease inhibitors (Roche) for 20 min at 4°C with mild  
516 agitation and analysed by Western blot.

517

#### 518 Western blot

519 Cells lysates were resuspended in Laemmli buffer and resolved by SDS-PAGE in 10%  
520 polyacrylamide gels. Proteins were electro-transferred onto PVDF membranes that were then  
521 blocked for 30 min in TBS containing 0.1% Tween 20 and 5% dry milk and incubated for 1 h to  
522 overnight with primary antibodies diluted in the blocking solution. After washes in TBS–Tween,  
523 the membranes were further incubated for 1 h with secondary antibodies coupled to HRP,  
524 washed as before and incubated with luminescence-generating HRP substrate. Bound  
525 antibodies were revealed by luminography on film.

526

#### 527 Statistical analysis

528 The comparison of two groups was performed using Student's t-test or its non-parametric  
529 correspondent, the Mann-Whitney test, if normality was not granted either because not  
530 checked or because rejected (Shapiro-Wilks test). The comparisons of more than two groups  
531 were made using one or two way ANOVAs followed by post-hoc tests (Holm Sidak's or Tukey's  
532 HSD, see table 1 for details) to identify all the significant group differences. N indicates  
533 independent biological replicates. The graphs with error bars indicate 1 SEM (+/-) except for  
534 figure 1C-H where we used box plots showing distribution of medians (whiskers = min and  
535 max values). The significance level is denoted as usual (\* $p$ <0.05, \*\* $p$ <0.01, \*\*\* $p$ <0.001). All  
536 the statistical analyses were performed using Prism7 (Graphpad version 7.0a, April 2, 2016).

537 Means, confidence intervals, degrees of freedom and p values were calculated using Prism7.

538 Effect sizes are either those reported by the software or Cohen's D calculated as the difference

539 of means divided by the pooled weighted standard deviation:

540 
$$(|m_1 - m_2|) / \sqrt{\left( SD_1^2 \times \frac{n_1}{(n_1+n_2)} \right) + \left( SD_2^2 \times \frac{n_2}{(n_1+n_2)} \right)}.$$

541 The results of the statistical analyses are listed in table 1.

542

## 543 Results

### 544 Alix is required for synaptic plasticity

545 To study the effect of Alix on the number of synapses, we first compared brains of Alix ko  
546 (Laporte et al., 2017) and wt mice and found that the density of dendritic spines in the CA1  
547 hippocampal region of adult brains stained with Golgi-Cox was not different (Supplementary  
548 figure 1). Similarly, EM examination of the same CA1 hippocampal region revealed no  
549 difference in the number of synaptic contacts between wt and Alix ko neurons (Figure 1A). In  
550 cultured hippocampal neurons, the number of synapses revealed by co-immunostaining with  
551 synapsin-1 and PSD95, was similar between wt and Alix ko (Figure 1B) indicating that Alix is  
552 not required for synaptogenesis. However, EM of the CA1 *stratum radiatum* of adult mice  
553 showed that Alix ko synapses contained significantly fewer synaptic vesicles (SV) than wt  
554 (Figure 1C, D). Furthermore, the size of postsynaptic densities, known to be strictly correlated  
555 with the number of SV (Harris and Stevens, 1989), was similarly reduced in Alix ko synapses  
556 (Figure 1F, G). Importantly, the surface of Alix ko synaptic boutons was also significantly  
557 increased suggesting plasma membrane accumulation in these synapses (Figure 1C, E). Finally,  
558 at the postsynaptic level, we also noticed that the ratio between the diameter of the spine  
559 head and that of the neck was changed in Alix ko animals suggesting possible defects in  
560 maturation or plasticity of adult synapses lacking Alix (Figure 1F, H).

561 Using electrophysiological recordings of acute hippocampal slices from adult animals, we  
562 next examined if the morphological differences detected in Alix ko synapses might translate  
563 into alterations of their function. For this, we performed field recordings in the CA1 *stratum*  
564 *radiatum* of hippocampal slices during stimulation of Schaffer collaterals. As shown on figure  
565 2A the input-output curves were not significantly different between Alix ko and wt animals  
566 indicating that, in this region, both the connectivity and the basal synaptic transmission are  
567 not grossly affected by the lack of Alix. However, in the same slices, long-term potentiation  
568 (LTP) induced by tetanic stimulations was significantly impaired in Alix ko, compared to wt  
569 hippocampal slices (average recordings between 25 and 35 min post-high-frequency  
570 stimulation:  $105.02 \pm 13.86$  % in Alix ko compared to  $180.70 \pm 11.19$  % in wt, Figure 2B). In the  
571 same CA3/CA1 synapses, the paired-pulse facilitation ratio was significantly reduced in ko  
572 animals ( $1.43 \pm 0.04$  in ko vs  $1.62 \pm 0.07$  in wt, Figure 2C). Furthermore, synaptic fatigue,  
573 induced by repeated stimulations at 25 Hz, was significantly increased in absence of Alix

574 (Figure 2D). Thus, electrophysiological recordings reveal presynaptic anomalies, which may be  
575 related to impairments in high frequency-induced LTP.

576

577 Alix is recruited to synapses upon synaptic activation.

578 We next used dissociated cortical neuron cultures to decipher the role of Alix at synapses.  
579 Western blot analysis during *in vitro* differentiation revealed that Alix expression strongly  
580 increases during synaptogenesis as indicated by the parallel rise in postsynaptic density  
581 protein 95 (PSD95) expression (Figure 3A). Moreover, synaptosome-enriched membranes  
582 prepared from cortical neurons (15 DIV) contained Alix (Figure 3B). This synaptic pool  
583 increased when neuron cultures were incubated 15 min with the GABA<sub>A</sub> receptor antagonist  
584 bicuculline, together with a weak potassium channel blocker 4-aminopyridine (4AP)(Figure 3B),  
585 a treatment known to increase the frequency of action potential bursts and thereby induce  
586 sustained intracellular calcium elevation (Supplementary figure 2A) (Hardingham et al., 2001;  
587 Hardingham et al., 2002). Therefore, this observation suggests that Alix tends to concentrate  
588 at synapses undergoing prolonged stimulations. To show that this is indeed the case, we used  
589 live imaging to follow mCherry-Alix relocation to synapses in 15 DIV hippocampal neurons.  
590 While the fluorescent signal was homogeneously distributed throughout the entire neuronal  
591 cytoplasm in resting conditions (Figure 3C, t= 0 min), it almost doubled in discrete spots within  
592 neuronal processes during synaptic activation corresponding to active presynaptic boutons  
593 labelled with Synaptophysin-pHluorin (Syp-pH) (Granseth et al., 2006) (arrowheads Figure 3C,  
594 t= 2:20, 4 and 6 min; Movie 1). Alix recruitment to these sites is concomitant with the  
595 activation of glutamatergic synapses, as it became detectable a few seconds after addition of  
596 bicuculline/4AP to the culture medium and decreased soon after washing the cells (Figure 3  
597 C, D). Thus, we demonstrate that mCherry-Alix recruitment occurs at presynaptic sites that  
598 display transient increase of Syp-pH fluorescence induced by stimulation (arrowheads Figure  
599 3C, Figure 3D; Movie 1). Alix localization at axonal boutons was confirmed in bicuculline/4AP  
600 stimulated and fixed-neurons expressing Alix-YFP and immunolabelled for synapsin-1 to reveal  
601 presynaptic boutons (Figure 3E, F). Similar experiments using anti-PSD95 immunostaining  
602 showed that Alix-positive spots were juxtaposed to but did not overlap with the postsynaptic  
603 density marker (Figure 3G). Measuring Alix-YFP fluorescence intensities in dendritic spines  
604 before and during stimulation showed no accumulation of Alix at the post-synaptic level

605 (Supplementary figure 2B, C), further demonstrating that synaptic activation leads to Alix  
606 recruitment only at pre-synaptic parts.

607

#### 608 Recruitment of Alix partners, ALG-2 and endophilin-A, at activated synapses

609 In non-neuronal cells, Alix recruitment to plasma membrane wounds was shown to be  
610 caused by calcium entry. Calcium binds ALG-2, a penta-EF-hand containing protein, which  
611 thereafter interacts with Alix allowing its recruitment to the plasma membrane (Scheffer et  
612 al., 2014). In neurons, action potential depolarization induces massive and transient calcium  
613 accumulation in the bouton, which triggers fusion of SV with the plasma membrane. Adding  
614 the intra-cellular calcium chelators BAPTA-AM or EGTA-AM completely abolished Alix-YFP  
615 recruitment (Supplementary figure 3). Interestingly, GFP-ALG-2 concentrated at presynaptic  
616 boutons upon synaptic activation (Figure 4A, B), in contrast to an ALG-2 point-mutant unable  
617 to bind calcium (ALG-2 $\Delta$ Ca) (Figure 4B). ALG-2 recruitment does not depend on Alix, as it  
618 concentrates at stimulated synapses of both wt and Alix ko neurons (Figure 4B, 4C left bars).  
619 On the contrary, Alix recruitment to active synapses is tightly dependent on its capacity to  
620 interact with ALG-2, as a mutated version of the protein unable to interact with ALG-2  
621 (Alix $\Delta$ ALG-2) (Suzuki et al., 2008; Trioulier et al., 2004) does not accumulate at presynaptic  
622 boutons upon stimulation (Figure 4C, right bars).

623 Among other partners of Alix, endophilins-A are main regulators of endocytosis at synapses  
624 and impact the number of SVs (Milosevic et al., 2011; Schuske et al., 2003). We therefore  
625 tested if endophilins could be recruited to active synapses, similarly to Alix and ALG-2.  
626 Endophilin-A2-mCherry was mainly detected at presynaptic boutons but its fluorescence  
627 increased during bicuculline/4AP treatment (Figure 4D, E; Movie 2). Remarkably, no such  
628 increase could be seen in Alix ko neurons, whereas Alix deleted of its endophilin binding  
629 domain (Alix $\Delta$ endo), was still able to be recruited to synapses upon activation (Figure 4F). This  
630 observation strongly suggests that the increase in endophilin concentration during sustained  
631 synaptic activation requires Alix expression.

632

#### 633 Alix is required for ADBE

634 Altogether, our observations indicate that calcium increase at synapses undergoing  
635 sustained activity allows the transient recruitment of ALG-2/Alix and endophilin-A to pre-  
636 synaptic parts. Because of our EM observations showing that Alix ko axonal bouton are bigger

637 and have significantly fewer SVs, we next tested which step of the turnover of presynaptic  
638 vesicles might be affected by the lack of the protein. We used Syp-pH expressing neurons and  
639 followed their fluorescence during electrical stimulation to trigger exocytosis. Recapture of  
640 synaptic proteins from the plasma membrane results in decay in fluorescence, reflecting SV  
641 retrieval and vesicle re-acidification (Soykan et al., 2017). As illustrated in figures 5A and B,  
642 fluorescence increases during stimulation (exocytosis) followed by a decrease thereafter  
643 (endocytosis), with no drastic difference between Alix ko and wt neurons for the two  
644 stimulation frequencies, 5 and 40 Hz. However, the time constant of the exponential decay  
645 was slightly decreased in Alix ko neurons stimulated at 40 Hz, suggesting a higher rate of Syp-  
646 pH endocytosis occurring at this frequency (Figure 5B).

647 We next tested if the protein might intervene in activity-dependent bulk endocytosis  
648 (ADBE) at synapses. Cultured cerebellar granular neurons (CGN) have been extensively used  
649 to study this process (Cheung et al., 2010). Here, neurons were depolarized with 50 mM KCl,  
650 in the presence of Horse Radish Peroxidase (HRP) that is endocytosed and fills vesicles and  
651 endosomes as they form. EM examination of wt synapses showed that depolarization  
652 dramatically increased the number of vacuoles decorated by HRP. We verified using FIB SEM  
653 and 3D reconstruction that these vacuoles had undergone fission from the plasma membrane  
654 and could therefore be identified as bulk endosomes (Figure 5C yellow arrowheads; Figure  
655 5D). Other HRP positive vesicles having the size of neurotransmitter vesicles were also more  
656 numerous in depolarized synapses (Figure 5C blue arrowheads; Figure 5D, E). In Alix ko  
657 synapses, the number of depolarization-induced bulk endosomes was strongly reduced  
658 (Figure 5E, F). Consistent with the increased endocytic rate detected by Syp-pH in Alix ko  
659 neurons stimulated at 40 Hz (Figure 5B), the number of newly formed SV was significantly  
660 increased, suggesting a mechanism compensating for ADBE deficiency (Figure 5G).

661 Another way to assess for ADBE is by the use of fluorescent 10 kDa dextran, a fluid phase  
662 cargo that accumulates inside bulk endosomes but fails to label vesicles formed by clathrin-  
663 dependent mechanisms upon neuronal stimulation (Clayton and Cousin, 2009a). Hippocampal  
664 neurons incorporated dextran when incubated in presence of bicuculline/4AP. A GSK3  
665 inhibitor, known to block ADBE but not other modes of SV endocytosis (Clayton et al., 2010),  
666 completely abolished the dextran labelling (Supplementary figure 4A, B). In contrast, Alix ko  
667 neurons failed to endocytose dextran (Figure 6A, B) even though bicuculline/4AP stimulation  
668 increased calcium entry (Supplementary figure 2A) and neuronal activity (Supplementary



669 figure 4C, D) in both Alix ko and wt neurons. As already shown (Morton et al., 2015), neurons  
670 also failed to endocytose dextran when treated with calcium chelators BAPTA and EGTA  
671 (Supplementary figure 4E), both of which blocked Alix recruitment to presynaptic boutons  
672 (Supplementary figure 3). Finally, rescue experiments showed that the impairment in ADBE  
673 observed in Alix ko cells is due solely to the absence of Alix, since restoring Alix expression  
674 fully restored the capacity of Alix ko cells to endocytose 10 kDa dextran (Figure 6 C, D). In sharp  
675 contrast, expression of Alix $\Delta$ ALG-2 or Alix $\Delta$ Endo was not able to rescue dextran endocytosis  
676 by Alix ko neurons (Figure 6I). Noteworthy, an Alix mutant (Alix $\Delta$ 4B) unable to bind the ESCRT-  
677 III protein CHMP4B, was still able to rescue ADBE in Alix ko neuron. These results demonstrate  
678 that the capacity of Alix to drive ADBE requires interaction with both endophilin-A and ALG-2  
679 but not with ESCRT-III.

680

#### 681 Alix conditional-ko mice undergo less kainate induced acute seizures.

682 The physiological relevance of ADBE remains today unclear but it is thought that it allows  
683 synapses to sustain high frequency stimulations such as those seen during epilepsy. We tested  
684 this possibility by studying the acute phase of a mouse model for human temporal lobe  
685 epilepsy (Bedner et al., 2015). The unilateral intracortical kainate injection induces the acute  
686 phase, *status epilepticus*, characterized by high seizure frequency, during several hours.  
687 Seizure activity was determined by telemetric EEG recording and synchronized video  
688 monitoring (Figure 7A, B). Here we used Alix conditional-ko mice where Alix is deleted in  
689 neocortical and hippocampal excitatory neurons (Gorski et al., 2002) (Figure 7A). The total  
690 duration of *status epilepticus* (SE) was comparable in Alix ko (median 1.70 h; Interquartile  
691 range, IQR = 1.85) and control mice (1.63 h; IQR = 2.55, Figure 7C). However, Alix ko mice  
692 experienced about 66 % less seizures than control mice (8; IQR = 13 seizures in ko vs. 18;  
693 IQR = 23 in control, Figure 7D). The average seizure duration was only minimally reduced in  
694 Alix ko compared to control (25.7 s; IQR = 19.36 vs. 32.9 s; IQR = 19.54, Figure 7E). These  
695 results show that the absence of Alix selectively reduces the number of high frequency events  
696 (single seizures), without affecting the total duration of *status epilepticus*.

697 The intracortical kainate injection model of temporal lobe epilepsy employed here produces  
698 seizures originating from the hippocampus, which can secondarily generalize and thereby  
699 spread to other (contralateral) brain areas. After EEG recording, 24 h post kainate injection,  
700 the brains were processed for immunohistochemical analysis (Figure 8) to assess microglial



701 (Iba1) reactivity in cortex (Figure 8A, B, D) and hippocampus (Figure 8A, C, D). In both control  
702 and Alix ko animals, quantification of Iba1 fluorescence intensity revealed an enhanced  
703 microglia activation on the ipsilateral side, related to the kainate injection (Figure 8B, C, E).  
704 While the difference between ipsi-and contralateral side was non-significant in control  
705 animals ( $\approx 10\%$ ), Alix ko animals displayed a significantly reduced contralateral microglial  
706 activation ( $\approx 30\%$ ,  $p=0.009$ ) (Figure 8E). As expected, this difference between Alix ko and wt  
707 animals was not seen using GFAP immunolabelling, reflecting the fact that astroglial activation  
708 peaks only 4-7 days after a CNS insult. (Supplementary figure 5). The reduced contralateral  
709 microglial activation seen in Alix ko animals is an indicator for reduced propagation of the  
710 seizure activity, corroborating the previous seizure quantification (Figure 7D).

711 In summary, Alix is specifically required for ADBE. Impairment in this process seen in Alix  
712 ko mice could be related to the lower number of SV and increase in the surface of presynaptic  
713 membranes observed *in vivo*, as well as to impairments in synaptic function and plasticity in  
714 normal and pathological settings.

715

## 716 Discussion

717 To sustain neurotransmission and prevent expansion of the presynaptic plasma membrane,  
718 synaptic vesicle (SV) fusion is coupled to the endocytic recycling and regeneration of SV  
719 proteins and lipids. Vesicle components can be retrieved from the plasma membrane via  
720 clathrin scaffolds, or via clathrin-independent processes mediating fast and ultrafast  
721 endocytosis and, in the case of high frequency stimulation, bulk endocytosis (Gan and  
722 Watanabe, 2018). Using Alix ko cells, we recently discovered that Alix drives clathrin-  
723 independent-endocytosis (CIE) during ligand-induced endophilin-dependent endocytosis as  
724 well as bulk endocytosis (Laporte et al., 2017; Mercier et al., 2016). Furthermore, we had  
725 previously reported that Alix immunoreactivity in the rat hippocampus is strongly upregulated  
726 in synapses undergoing high frequency activation during kainate-induced epileptic seizures.  
727 Interestingly, endophilin-A and synaptophysin stainings revealed that this increase was  
728 presynaptic and only transient, as it was reversed soon after cessation of the seizures  
729 (Hemming et al., 2004). In order to study the possible role of Alix recruitment to presynaptic  
730 parts seen during seizures, we used primary cultures of cortical and hippocampal neurons  
731 which make networks undergoing spontaneous activities. Adding 4-aminopyridine (4-AP), a  
732 weak potassium channel blocker, together with bicuculline to block GABA<sub>A</sub> receptors, greatly  
733 increases spike frequency (Sup. Figure 6 C, D) and results in elevated calcium entry (sup. Figure  
734 3A)(Hardingham et al., 2001). Consistent with the kainate-induced Alix increase seen during  
735 epileptic seizures, bicuculline/4AP induced Alix to transiently concentrate at presynaptic parts  
736 of firing synapses. The use of dextran uptake to monitor bulk endocytosis revealed that the  
737 very same treatment triggered activity dependent bulk endocytosis (ADBE) which required  
738 Alix expression. Despite this, monitoring the decay of Syp-pH fluorescence did not reveal any  
739 obvious blockage of the endocytosis of the protein at 40 Hz. This is in good agreement with  
740 observations showing that at these frequencies, Syp-pH reveals synaptic CME or CIE but not  
741 ADBE (Nicholson-Fish et al., 2015; Soykan et al., 2017). In fact, Syp-pH fluorescent decay in Alix  
742 ko hippocampal neurons suggested an increase in endocytosis, confirmed by EM in cerebellar  
743 neurons, which could represent a compensatory process for the absence of Alix and  
744 concomitant ADBE impairment. Thus, the use of Alix ko neurons revealed that Alix is required  
745 for ADBE at synapses but does not seem to be involved in SV endocytosis.

746 ADBE is triggered by high [Ca<sup>2+</sup>] in response to sustained activity (Paillart et al., 2003).  
747 Calcium and calmodulin-dependent phosphatase calcineurin were suggested to make a link

748 between synaptic activity and formation of bulk endosomes through dynamin (Morton et al.,  
749 2015). Alix may represent another link as its recruitment and activity in ADBE seems  
750 dependent on calcium increase. EGTA, which binds calcium at an approximately 100 times  
751 slower on-rate than BAPTA (Adler et al., 1991; Schneggenburger and Neher, 2005), and was  
752 already known to block ADBE without affecting synaptic release, was equally efficient as  
753 BAPTA in inhibiting Alix recruitment. This recruitment required Alix capacity to bind the  
754 calcium-binding protein ALG-2, which also concentrated at hyperactive synapses. ALG-2 is a  
755 cytosolic penta-EF hand-containing protein with two  $\text{Ca}^{2+}$  binding sites ( $K_d = 1.2 \mu\text{M}$ ), and its  
756 interaction with Alix strictly depends on calcium (Missotten et al., 1999; Shibata et al., 2004;  
757 Trioulier et al., 2004). Conformational change and exposure of hydrophobic patches occur at  
758  $\mu\text{M}$  concentrations of  $\text{Ca}^{2+}$ , suggesting that ALG-2 functions as a calcium sensor (Maki et al.,  
759 2016). Indeed, in non-neuronal cells, calcium entry provoked by membrane wounds leads to  
760 the sequential recruitment to the membrane of ALG-2, Alix and ESCRT-III proteins necessary  
761 for membrane repair (Jimenez et al., 2014; Scheffer et al., 2014). In neurons, the activity-  
762 dependent accumulation of ALG-2 at synapses required  $\text{Ca}^{2+}$  binding as it was totally abolished  
763 by point-mutations within the two  $\text{Ca}^{2+}$  binding sites. Interestingly, ALG-2 recruitment at  
764 synapses did not require Alix, as it also occurred in Alix ko neuron. Thus, our observations  
765 highlight synaptic ALG-2 as an obvious candidate for sensing calcium elevation and suggest  
766 the following scenario: sustained high frequency depolarization leads to massive elevation of  
767 calcium in the synaptic bouton;  $\text{Ca}^{2+}$  binding to ALG-2 causes its accumulation at the synaptic  
768 membrane and binding to cytosolic Alix, whose recruitment to the membrane drives ADBE. It  
769 remains unclear how ALG-2 interacts with lipid bilayers (Maki et al., 2016; Scheffer et al., 2014).  
770 For Alix, a change in conformation induced by binding to ALG-2 allows its interaction with  
771 lysobisphosphatidic acid (LBPA), a phospholipid only present in late endosomes (Bissig and  
772 Gruenberg, 2014; Bissig et al., 2013; Sun et al., 2015). If they exist, equivalent lipids from the  
773 plasma membrane favouring Alix recruitment remain to be discovered.

774 Little is known about the molecular mechanisms underlying the plasma membrane  
775 deformation during ADBE. The proline rich domain of Alix interacts with the SH3 domains of  
776 endophilins-A1-3 which contain N-BAR domains and have been shown to regulate clathrin-  
777 dependent and -independent SV endocytosis at different synapses (Gad et al., 2000; Llobet et  
778 al., 2011; Ringstad et al., 1999). BAR domains are dimerization domains able to induce,  
779 stabilize and sense membrane curvature (Farsad et al., 2001; Kjaerulff et al., 2011).

780 Interestingly, a proteomic approach has recently revealed the presence of endophilin-A1, Alix  
781 and ALG-2 in bulk endosomes (Kokotos et al., 2018). Furthermore, endophilin-A2, actin and  
782 dynamin mediate a restricted type of CIE activated upon ligand binding to cargo receptors  
783 (Boucrot et al., 2014; Renard et al., 2014). Endophilin-A and Alix act in the same CIE pathway,  
784 even if Alix is more promiscuous for ligands, as it is also involved in fluid phase endocytosis. In  
785 fibroblasts, interaction of Alix with endophilins favours their presence at the membrane  
786 (Mercier et al., 2016). In hippocampal neurons, endophilin-A2 decorated presynapses of  
787 resting neurons but Alix was needed for its synaptic increase during stimulation. In turn, Alix  
788 recruitment did not need interaction with endophilins to be recruited. Concave cytoplasmic  
789 surfaces of the plasma membrane are thought to trigger the recruitment of endophilin-A  
790 through their BAR domains (Boucrot et al., 2014; Kjaerulff et al., 2011). At synapses, Alix might  
791 represent an adaptor concentrating endophilins onto the flat membranes of the peri-active  
792 zone to drive membrane bending in response to high calcium concentrations. Alix-endophilin  
793 complex is required for ADBE, as demonstrated by the lack of rescue of ADBE by an Alix point  
794 mutant unable to interact with endophilin, a finding reminiscent of that seen in the case of  
795 CIE of Cholera Toxin B (CTxB) (Mercier et al., 2016). Interestingly, the incapacity of Alix to  
796 interact with Chmp4B from ESCRT-III, known to alleviate its plasma membrane repair ability  
797 (Jimenez et al., 2014; Scheffer et al., 2014), did not alter rescue of ADBE. This result also  
798 discriminates Alix-driven ADBE from roles of the ESCRT system in the degradation of SV  
799 proteins (Sadoul et al., 2017; Sheehan et al., 2016).

800 The role of ADBE *in vivo* is not fully understood, in part due to a lack of models in which  
801 synaptic ADBE is selectively impaired. The severe LTP impairment and increased synaptic  
802 fatigue observed in Alix ko hippocampus could be related to the difficulty of synapses to deal  
803 with the repeated stimulations necessary to trigger potentiation. As such, they represent a  
804 first demonstration of the necessity of ADBE for normal synaptic plasticity. Excitatory,  
805 glutamatergic neurotransmission plays a central role in the generation of seizure activity  
806 (Albrecht and Zielińska, 2017; Barker-Haliski and White, 2015) and figures among the primary  
807 anti-epileptic drug targets (Rogawski and Löscher, 2004). Sustained, intense and synchronous  
808 neurotransmission as occurring during seizures requires replenishment of synaptic vesicle  
809 pools mainly through activity-dependent bulk endocytosis (ADBE) (Cheung and Cousin, 2012).  
810 Impairing ADBE *in vivo*, by deleting Alix in neocortical and hippocampal excitatory neurons  
811 (Gorski et al., 2002), led to a significantly reduced number of seizures during SE, without

812 affecting the total duration of SE or the mean seizure duration. The present results suggest  
813 that excitatory networks lacking Alix have a reduced capacity to initiate sequential seizures,  
814 due to an impaired replenishment of synaptic vesicles through ADBE. Seizure termination and  
815 *status epilepticus* cessation however seem to be governed by distinct mechanisms, probably  
816 involving inhibitory transmission to re-establish the balance between excitation and inhibition  
817 in the brain. Our results highlight Alix ko mice as an invaluable tool for exploring and  
818 understanding more precisely the exact role of ADBE at synapses undergoing normal and  
819 pathological stimulations.

## 820 References

- 821
- 822 Adler, E.M., G.J. Augustine, S.N. Duffy, and M.P. Charlton. 1991. Alien intracellular calcium  
823 chelators attenuate neurotransmitter release at the squid giant synapse. *J Neurosci.*  
824 11:1496-1507.
- 825 Albrecht, J., and M. Zielińska. 2017. Mechanisms of Excessive Extracellular Glutamate  
826 Accumulation in Temporal Lobe Epilepsy. *Neurochem Res.* 42:1724-1734.
- 827 Barker-Haliski, M., and H.S. White. 2015. Glutamatergic Mechanisms Associated with  
828 Seizures and Epilepsy. *Cold Spring Harb Perspect Med.* 5:a022863.
- 829 Bedner, P., A. Dupper, K. Huttmann, J. Muller, M.K. Herde, P. Dublin, T. Deshpande, J.  
830 Schramm, U. Haussler, C.A. Haas, C. Henneberger, M. Theis, and C. Steinhauser.  
831 2015. Astrocyte uncoupling as a cause of human temporal lobe epilepsy. *Brain.*  
832 138:1208-1222.
- 833 Bissig, C., and J. Gruenberg. 2014. ALIX and the multivesicular endosome: ALIX in  
834 Wonderland. *Trends Cell Biol.* 24:19-25.
- 835 Bissig, C., M. Lenoir, M.C. Velluz, I. Kufareva, R. Abagyan, M. Overduin, and J. Gruenberg.  
836 2013. Viral infection controlled by a calcium-dependent lipid-binding module in ALIX.  
837 *Dev Cell.* 25:364-373.
- 838 Boucrot, E., A.P. Ferreira, L. Almeida-Souza, S. Debard, Y. Vallis, G. Howard, L. Bertot, N.  
839 Sauvonnet, and H.T. McMahon. 2014. Endophilin marks and controls a clathrin-  
840 independent endocytic pathway. *Nature.*
- 841 Campos, Y., X. Qiu, E. Gomero, R. Wakefield, L. Horner, W. Brutkowski, Y.G. Han, D. Solecki,  
842 S. Frase, A. Bongiovanni, and A. d'Azzo. 2016. Alix-mediated assembly of the  
843 actomyosin-tight junction polarity complex preserves epithelial polarity and epithelial  
844 barrier. *Nature communications.* 7:11876.
- 845 Chanaday, N.L., and E.T. Kavalali. 2018. Time course and temperature dependence of  
846 synaptic vesicle endocytosis. *FEBS Lett.* 592:3606-3614.
- 847 Chassefeyre, R., J. Martinez-Hernandez, F. Bertaso, N. Bouquier, B. Blot, M. Laporte, S.  
848 Fraboulet, Y. Coute, A. Devoy, A.M. Isaacs, K. Pernet-Gallay, R. Sadoul, L. Fagni, and Y.  
849 Goldberg. 2015. Regulation of Postsynaptic Function by the Dementia-Related ESCRT-  
850 III Subunit CHMP2B. *J Neurosci.* 35:3155-3173.
- 851 Chatellard-Causse, C., B. Blot, N. Cristina, S. Torch, M. Missotten, and R. Sadoul. 2002. Alix  
852 (ALG-2-interacting protein X), a protein involved in apoptosis, binds to endophilins  
853 and induces cytoplasmic vacuolization. *J Biol Chem.* 277:29108-29115.
- 854 Cheung, G., and M.A. Cousin. 2012. Adaptor protein complexes 1 and 3 are essential for  
855 generation of synaptic vesicles from activity-dependent bulk endosomes. *J Neurosci.*  
856 32:6014-6023.
- 857 Cheung, G., O.J. Jupp, and M.A. Cousin. 2010. Activity-dependent bulk endocytosis and  
858 clathrin-dependent endocytosis replenish specific synaptic vesicle pools in central  
859 nerve terminals. *J Neurosci.* 30:8151-8161.
- 860 Clayton, E.L., and M.A. Cousin. 2009a. The molecular physiology of activity-dependent bulk  
861 endocytosis of synaptic vesicles. *J Neurochem.* 111:901-914.
- 862 Clayton, E.L., and M.A. Cousin. 2009b. Quantitative monitoring of activity-dependent bulk  
863 endocytosis of synaptic vesicle membrane by fluorescent dextran imaging. *J Neurosci*  
864 *Methods.* 185:76-81.
- 865 Clayton, E.L., N. Sue, K.J. Smillie, T. O'Leary, N. Bache, G. Cheung, A.R. Cole, D.J. Wyllie, C.  
866 Sutherland, P.J. Robinson, and M.A. Cousin. 2010. Dynamin I phosphorylation by

- 867 GSK3 controls activity-dependent bulk endocytosis of synaptic vesicles. *Nat Neurosci.*  
868 13:845-851.
- 869 de Chaumont, F., S. Dallongeville, N. Chenouard, N. Herve, S. Pop, T. Provoost, V. Meas-  
870 Yedid, P. Pankajakshan, T. Lecomte, Y. Le Montagner, T. Lagache, A. Dufour, and J.C.  
871 Olivo-Marin. 2012. Icy: an open bioimage informatics platform for extended  
872 reproducible research. *Nature methods.* 9:690-696.
- 873 Farsad, K., N. Ringstad, K. Takei, S.R. Floyd, K. Rose, and P. De Camilli. 2001. Generation of  
874 high curvature membranes mediated by direct endophilin bilayer interactions. *J Cell*  
875 *Biol.* 155:193-200.
- 876 Faure, J., G. Lachenal, M. Court, J. Hirrlinger, C. Chatellard-Causse, B. Blot, J. Grange, G.  
877 Schoehn, Y. Goldberg, V. Boyer, F. Kirchhoff, G. Raposo, J. Garin, and R. Sadoul. 2006.  
878 Exosomes are released by cultured cortical neurones. *Mol Cell Neurosci.* 31:642-648.
- 879 Frandemiche, M.L., S. De Seranno, T. Rush, E. Borel, A. Elie, I. Arnal, F. Lante, and A. Buisson.  
880 2014. Activity-dependent tau protein translocation to excitatory synapse is disrupted  
881 by exposure to amyloid-beta oligomers. *J Neurosci.* 34:6084-6097.
- 882 Gad, H., N. Ringstad, P. Low, O. Kjaerulff, J. Gustafsson, M. Wenk, G. Di Paolo, Y. Nemoto, J.  
883 Crun, M.H. Ellisman, P. De Camilli, O. Shupliakov, and L. Brodin. 2000. Fission and  
884 uncoating of synaptic clathrin-coated vesicles are perturbed by disruption of  
885 interactions with the SH3 domain of endophilin. *Neuron.* 27:301-312.
- 886 Gan, Q., and S. Watanabe. 2018. Synaptic Vesicle Endocytosis in Different Model Systems.  
887 *Frontiers in cellular neuroscience.* 12:171.
- 888 Gorski, J.A., T. Talley, M. Qiu, L. Puelles, J.L. Rubenstein, and K.R. Jones. 2002. Cortical  
889 excitatory neurons and glia, but not GABAergic neurons, are produced in the Emx1-  
890 expressing lineage. *J Neurosci.* 22:6309-6314.
- 891 Granseth, B., B. Odermatt, S.J. Royle, and L. Lagnado. 2006. Clathrin-mediated endocytosis is  
892 the dominant mechanism of vesicle retrieval at hippocampal synapses. *Neuron.*  
893 51:773-786.
- 894 Hardingham, G.E., F.J. Arnold, and H. Bading. 2001. Nuclear calcium signaling controls CREB-  
895 mediated gene expression triggered by synaptic activity. *Nat Neurosci.* 4:261-267.
- 896 Hardingham, G.E., Y. Fukunaga, and H. Bading. 2002. Extrasynaptic NMDARs oppose synaptic  
897 NMDARs by triggering CREB shut-off and cell death pathways. *Nat Neurosci.* 5:405-  
898 414.
- 899 Harris, K.M., and J.K. Stevens. 1989. Dendritic Spines of Ca-1 Pyramidal Cells in the Rat  
900 Hippocampus - Serial Electron-Microscopy with Reference to Their Biophysical  
901 Characteristics. *Journal of Neuroscience.* 9:2982-2997.
- 902 Hemming, F.J., S. Fraboulet, B. Blot, and R. Sadoul. 2004. Early increase of apoptosis-linked  
903 gene-2 interacting protein X in areas of kainate-induced neurodegeneration.  
904 *Neuroscience.* 123:887-895.
- 905 Jimenez, A.J., P. Maiuri, J. Lafaurie-Janvore, S. Divoux, M. Piel, and F. Perez. 2014. ESCRT  
906 machinery is required for plasma membrane repair. *Science.* 343:1247136.
- 907 Kjaerulff, O., L. Brodin, and A. Jung. 2011. The structure and function of endophilin proteins.  
908 *Cell biochemistry and biophysics.* 60:137-154.
- 909 Kokotos, A.C., J. Peltier, E.C. Davenport, M. Trost, and M.A. Cousin. 2018. Activity-dependent  
910 bulk endocytosis proteome reveals a key presynaptic role for the monomeric GTPase  
911 Rab11. *Proc Natl Acad Sci U S A.* 115:E10177-E10186.
- 912 Kononenko, N.L., D. Puchkov, G.A. Classen, A.M. Walter, A. Pechstein, L. Sawade, N. Kaempfer,  
913 T. Trimbuch, D. Lorenz, C. Rosenmund, T. Maritzen, and V. Haucke. 2014.



- 914 Clathrin/AP-2 mediate synaptic vesicle reformation from endosome-like vacuoles but  
915 are not essential for membrane retrieval at central synapses. *Neuron*. 82:981-988.
- 916 Lagache, T., A. Grassart, S. Dallongeville, O. Faklaris, N. Sauvonnnet, A. Dufour, L. Danglot, and  
917 J.C. Olivo-Marin. 2018. Mapping molecular assemblies with fluorescence microscopy  
918 and object-based spatial statistics. *Nature communications*. 9:698.
- 919 Laporte, M.H., C. Chatellard, V. Vauchez, F.J. Hemming, J.C. Deloulme, F. Vossier, B. Blot, S.  
920 Fraboulet, and R. Sadoul. 2017. Alix is required during development for normal  
921 growth of the mouse brain. *Sci Rep*. 7:44767.
- 922 Llobet, A., J.L. Gallop, J.J. Burden, G. Camdere, P. Chandra, Y. Vallis, C.R. Hopkins, L. Lagnado,  
923 and H.T. McMahon. 2011. Endophilin drives the fast mode of vesicle retrieval in a  
924 ribbon synapse. *J Neurosci*. 31:8512-8519.
- 925 Maki, M., T. Takahara, and H. Shibata. 2016. Multifaceted Roles of ALG-2 in Ca(2+)-Regulated  
926 Membrane Trafficking. *Int J Mol Sci*. 17.
- 927 Martineau, M., A. Somasundaram, J.B. Grimm, T.D. Gruber, D. Choquet, J.W. Taraska, L.D.  
928 Lavis, and D. Perrais. 2017. Semisynthetic fluorescent pH sensors for imaging  
929 exocytosis and endocytosis. *Nature communications*. 8.
- 930 Marxen, M., W. Volkandt, and H. Zimmermann. 1999. Endocytic vacuoles formed following  
931 a short pulse of K<sup>+</sup> -stimulation contain a plethora of presynaptic membrane  
932 proteins. *Neuroscience*. 94:985-996.
- 933 Mercier, V., M.H. Laporte, O. Destaing, B. Blot, C.M. Blouin, K. Pernet-Gallay, C. Chatellard, Y.  
934 Saoudi, C. Albiges-Rizo, C. Lamaze, S. Fraboulet, A. Petiot, and R. Sadoul. 2016. ALG-2  
935 interacting protein-X (Alix) is essential for clathrin-independent endocytosis and  
936 signaling. *Sci Rep*. 6:26986.
- 937 Miller, T.M., and J.E. Heuser. 1984. Endocytosis of synaptic vesicle membrane at the frog  
938 neuromuscular junction. *J Cell Biol*. 98:685-698.
- 939 Milosevic, I., S. Giovedi, X. Lou, A. Raimondi, C. Collesi, H. Shen, S. Paradise, E. O'Toole, S.  
940 Ferguson, O. Cremona, and P. De Camilli. 2011. Recruitment of endophilin to clathrin-  
941 coated pit necks is required for efficient vesicle uncoating after fission. *Neuron*.  
942 72:587-601.
- 943 Missotten, M., A. Nichols, K. Rieger, and R. Sadoul. 1999. Alix, a novel mouse protein  
944 undergoing calcium-dependent interaction with the apoptosis-linked-gene 2 (ALG-2)  
945 protein. *Cell Death Differ*. 6:124-129.
- 946 Morton, A., J.R. Marland, and M.A. Cousin. 2015. Synaptic vesicle exocytosis and increased  
947 cytosolic calcium are both necessary but not sufficient for activity-dependent bulk  
948 endocytosis. *J Neurochem*. 134:405-415.
- 949 Nicholson-Fish, J.C., A.C. Kokotos, T.H. Gillingwater, K.J. Smillie, and M.A. Cousin. 2015.  
950 VAMP4 Is an Essential Cargo Molecule for Activity-Dependent Bulk Endocytosis.  
951 *Neuron*. 88:973-984.
- 952 Paillart, C., J. Li, G. Matthews, and P. Sterling. 2003. Endocytosis and vesicle recycling at a  
953 ribbon synapse. *J Neurosci*. 23:4092-4099.
- 954 Racine, R.J. 1972. Modification of seizure activity by electrical stimulation. II. Motor seizure.  
955 *Electroencephalogr Clin Neurophysiol*. 32:281-294.
- 956 Renard, H., M. Simunovic, J. Lemiere, E. Boucrot, M.D. Garcia-Castillo, S. Arumugam, V.  
957 Chambon, C. Lamaze, C. Wunder, A.K. Kenworthy, A.A. Schmidt, H.T. McMahon, C.  
958 Sykes, P. Bassereau, and L. Johannes. 2014. Endophilin-A2 functions in membrane  
959 scission in clathrin-independent endocytosis. *Nature*.



- 960 Ringstad, N., H. Gad, P. Low, G. Di Paolo, L. Brodin, O. Shupliakov, and P. De Camilli. 1999.  
961 Endophilin/SH3p4 is required for the transition from early to late stages in clathrin-  
962 mediated synaptic vesicle endocytosis. *Neuron*. 24:143-154.
- 963 Rogawski, M.A., and W. Löscher. 2004. The neurobiology of antiepileptic drugs. *Nat Rev*  
964 *Neurosci*. 5:553-564.
- 965 Sadoul, R. 2006. Do Alix and ALG-2 really control endosomes for better or for worse. *Bio*.  
966 *Cell*. 98:69-77.
- 967 Sadoul, R., M.H. Laporte, R. Chassefeyre, K.I. Chi, Y. Goldberg, C. Chatellard, F.J. Hemming,  
968 and S. Fraboulet. 2017. The role of ESCRT during development and functioning of the  
969 nervous system. *Semin Cell Dev Biol*.
- 970 Scheffer, L.L., S.C. Sreetama, N. Sharma, S. Medikayala, K.J. Brown, A. Defour, and J.K.  
971 Jaiswal. 2014. Mechanism of Ca(2+)-triggered ESCRT assembly and regulation of cell  
972 membrane repair. *Nature communications*. 5:5646.
- 973 Schneggenburger, R., and E. Neher. 2005. Presynaptic calcium and control of vesicle fusion.  
974 *Curr Opin Neurobiol*. 15:266-274.
- 975 Schuske, K.R., J.E. Richmond, D.S. Matthies, W.S. Davis, S. Runz, D.A. Rube, A.M. van der  
976 Blik, and E.M. Jorgensen. 2003. Endophilin is required for synaptic vesicle  
977 endocytosis by localizing synaptojanin. *Neuron*. 40:749-762.
- 978 Sheehan, P., M. Zhu, A. Beskow, C. Vollmer, and C.L. Waites. 2016. Activity-Dependent  
979 Degradation of Synaptic Vesicle Proteins Requires Rab35 and the ESCRT Pathway. *J*  
980 *Neurosci*. 36:8668-8686.
- 981 Shibata, H., K. Yamada, T. Mizuno, C. Yorikawa, H. Takahashi, H. Satoh, Y. Kitaura, and M.  
982 Maki. 2004. The penta-EF-hand protein ALG-2 interacts with a region containing PxY  
983 repeats in Alix/AIP1, which is required for the subcellular punctate distribution of the  
984 amino-terminal truncation form of Alix/AIP1. *J Biochem (Tokyo)*. 135:117-128.
- 985 Soykan, T., N. Kaempfer, T. Sakaba, D. Vollweiter, F. Goerdeler, D. Puchkov, N.L. Kononenko,  
986 and V. Haucke. 2017. Synaptic Vesicle Endocytosis Occurs on Multiple Timescales and  
987 Is Mediated by Formin-Dependent Actin Assembly. *Neuron*. 93:854-866 e854.
- 988 Sun, S., X. Zhou, J. Corvera, G.E. Gallick, S.H. Lin, and J. Kuang. 2015. ALG-2 activates the MVB  
989 sorting function of ALIX through relieving its intramolecular interaction. *Cell Discov*.  
990 1:15018.
- 991 Suzuki, H., M. Kawasaki, T. Inuzuka, M. Okumura, T. Kakiuchi, H. Shibata, S. Wakatsuki, and  
992 M. Maki. 2008. Structural basis for Ca<sup>2+</sup>-dependent formation of ALG-2/Alix peptide  
993 complex: Ca<sup>2+</sup>/EF3-driven arginine switch mechanism. *Structure*. 16:1562-1573.
- 994 Trioulier, Y., S. Torch, B. Blot, N. Cristina, C. Chatellard-Cause, J.M. Verna, and R. Sadoul.  
995 2004. Alix, a protein regulating endosomal trafficking, is involved in neuronal death. *J*  
996 *Biol Chem*. 279:2046-2052.
- 997 Watanabe, S., L.E. Mamer, S. Raychaudhuri, D. Luvsanjav, J. Eisen, T. Trimbuch, B. Sohl-  
998 Kielczynski, P. Fenske, I. Milosevic, C. Rosenmund, and E.M. Jorgensen. 2018.  
999 Synaptojanin and Endophilin Mediate Neck Formation during Ultrafast Endocytosis.  
1000 *Neuron*. 98:1184-1197 e1186.

1001  
1002

1003

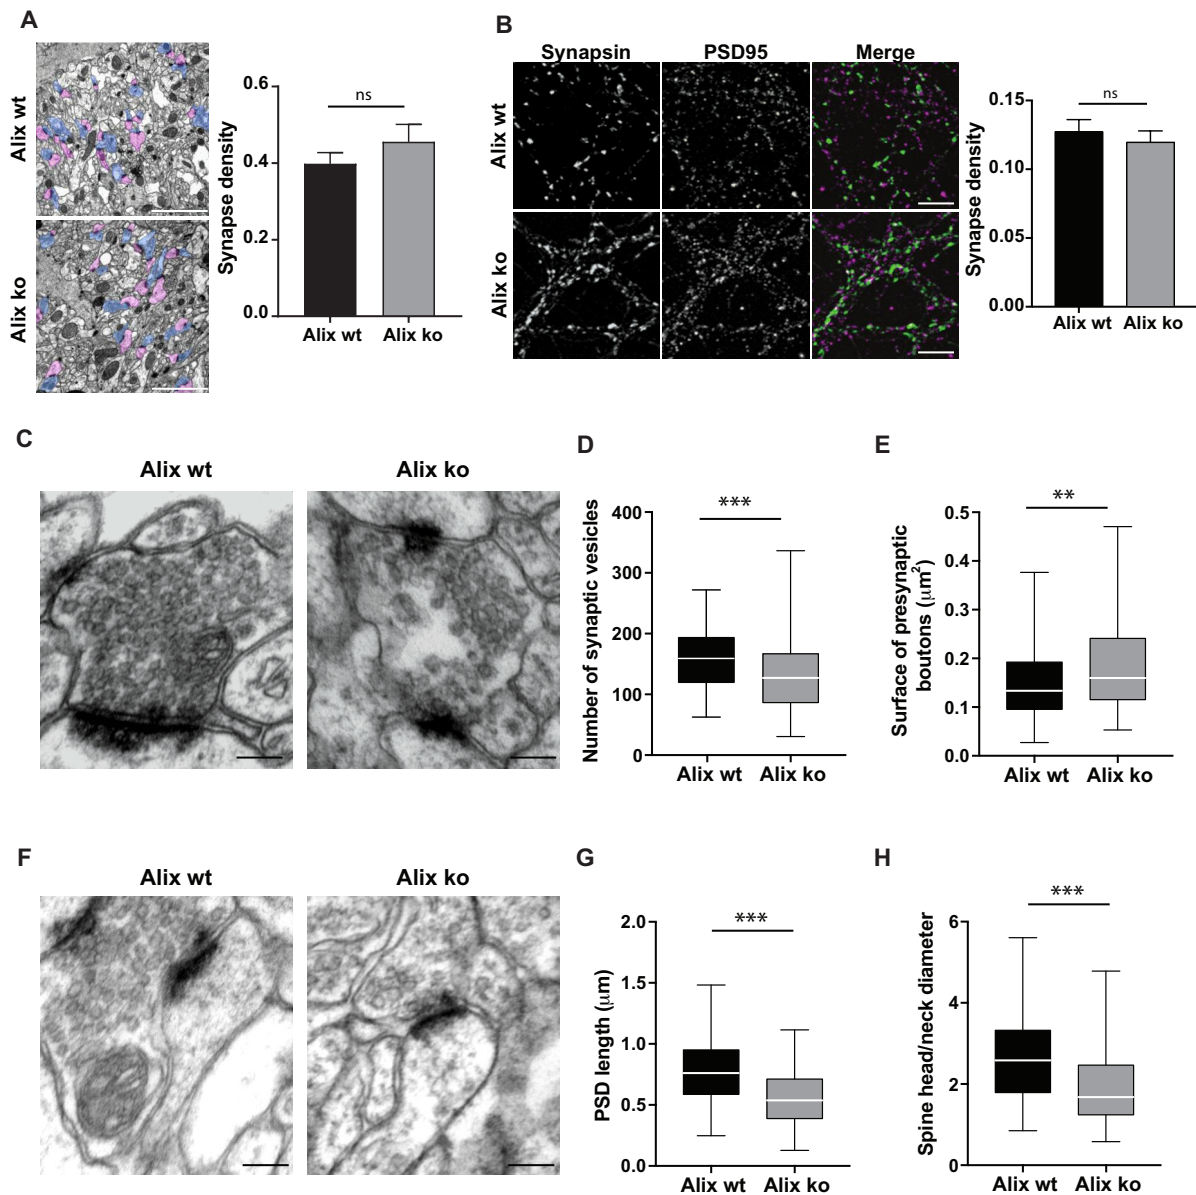

1004  
1005  
1006  
1007  
1008  
1009  
1010  
1011  
1012  
1013  
1014  
1015  
1016  
1017

**Figure 1. Alix is required for synaptic organisation.** A, B) show no apparent effect of the lack of Alix on the number of synapses both in vivo or in vitro. A) Representative electron micrographs of the CA1 stratum radiatum from Alix wt and ko brains. Presynaptic profiles are highlighted in blue, and dendritic spines are in purple (scale bar: 2  $\mu\text{m}$ ). Graph shows the synaptic density per  $\mu\text{m}^2$  (n=3 animals per genotype, p=0.1395, Unpaired t test). B) 15 DIV hippocampal neurons were stained by dual immunofluorescence with anti-PSD95 and anti-synapsin-1 antibodies. Immunolabelled objects were considered synapses when both stainings were juxtaposed (scale bar: 10  $\mu\text{m}$ ). The graph represents the number of synapses per  $\mu\text{m}^2$  (n=7 experiments, p=0.5501, Unpaired t test). C-G) Anomalies can be detected in synapses of Alix ko brains. C, F) Representative electron micrographs of CA1 from Alix wt and ko mice (scale bar: 200 nm). Graphs represent D) numbers of synaptic vesicles per  $\mu\text{m}^2$  (n=136 synapses from 3 animals, p=0.0009, Mann Whitney test), E) presynaptic bouton surface area (n=136 synapses from 3 animals, p=0.0036, Mann Whitney test), G) PSD length (n=136 synapses from 3 animals, p=0.0001, Mann Whitney test) and H) ratio between the diameter of the spine head and neck.

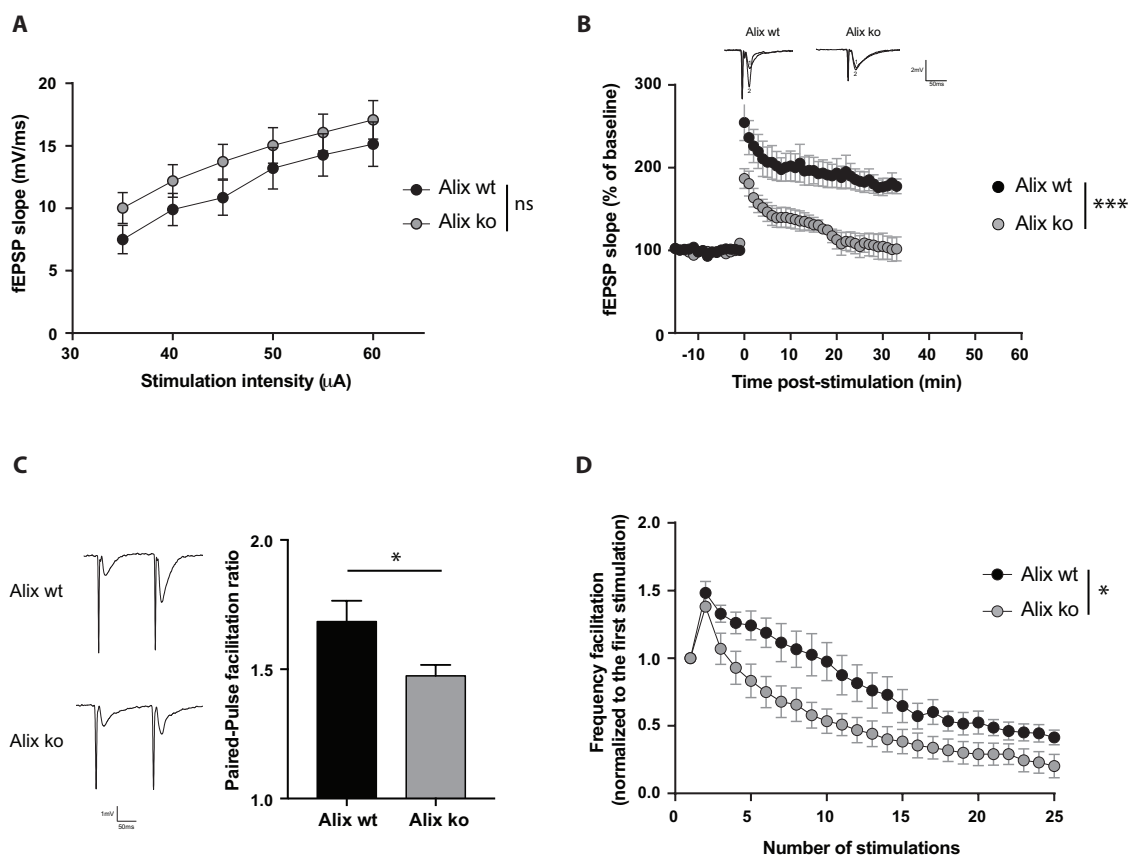

1018  
 1019 **Figure 2. Synaptic plasticity in CA1 is altered in absence of Alix.** A) Input-output relationship of fEPSP  
 1020 slope evoked by stimulation of Schaeffer collaterals at various intensities in slices from Alix wt and ko  
 1021 mice (n=16 wt slices and n=13 ko slices from 3 animals per genotype, p=0.9166, two-way ANOVA). B)  
 1022 Long-term potentiation of fEPSP slope evoked by high frequency stimulation of Schaeffer collaterals  
 1023 delivered at time 0. Inserts show representative EPSPs traces. (n=5 slices from 3 animals per genotype,  
 1024 p=0.0001, two-way ANOVA). C) Paired-pulse facilitation ratio. Facilitation is induced by two  
 1025 consecutive stimuli of Schaeffer collaterals separated by 50 ms (n=16 wt slices and n=13 ko slices from  
 1026 3 animals per genotype, p=0.0187, Unpaired t test). Representative traces are shown on the left. D)  
 1027 Synaptic fatigue induced by stimulation of Schaffer collaterals at 25 Hz (n=5 slices from 3 animals per  
 1028 genotype, p=0.0001, two-way ANOVA). (n=136 synapses from 3 animals, p=0.0001, Mann Whitney  
 1029 test).  
 1030

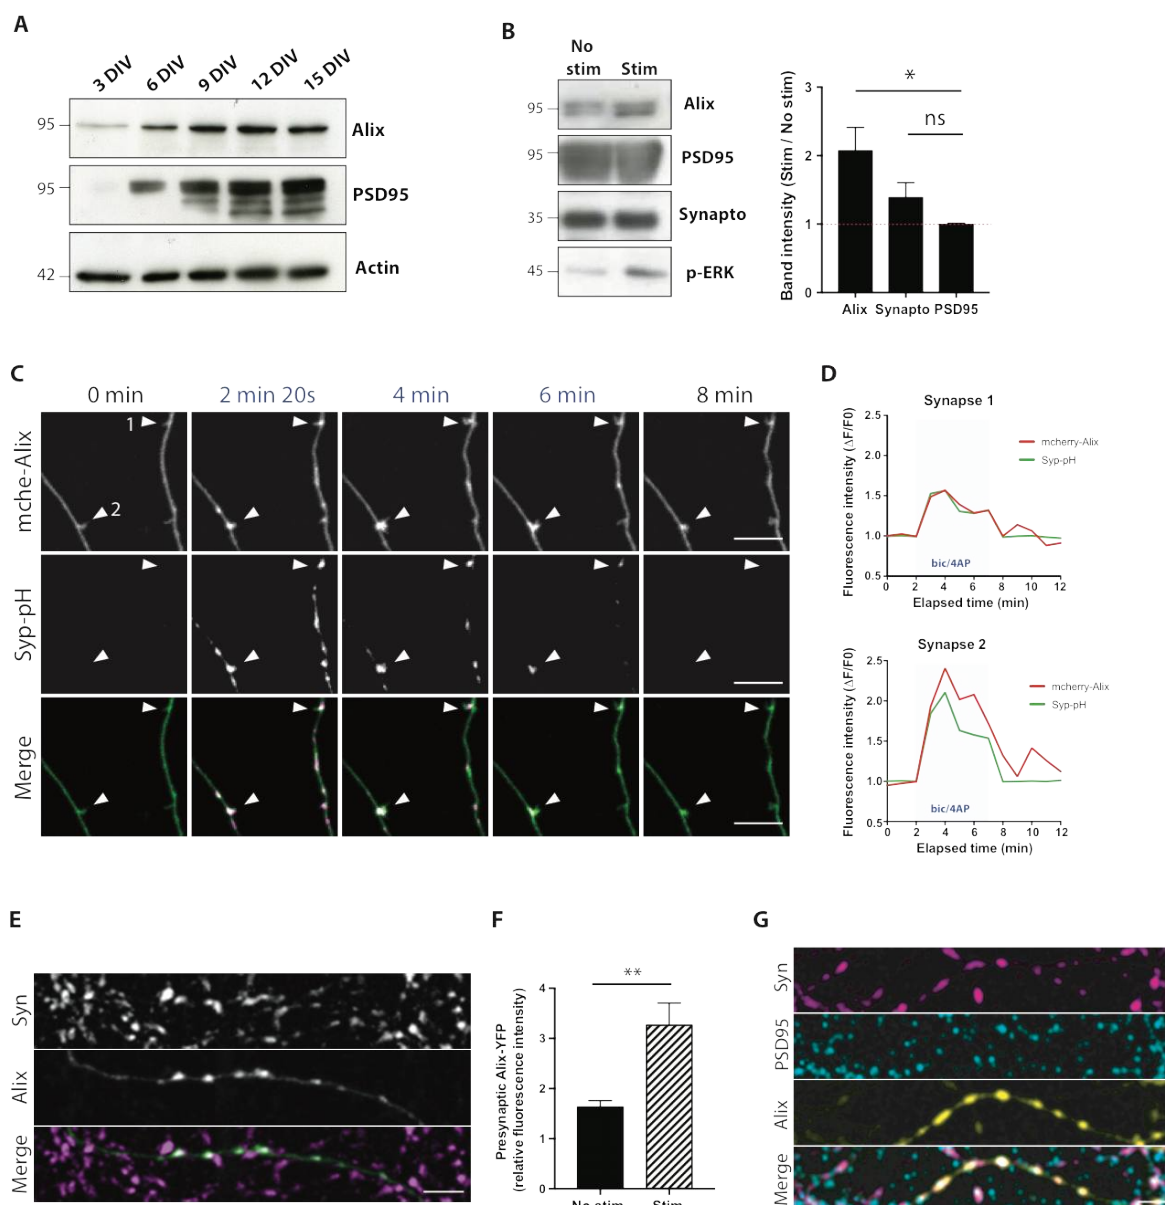

1031  
 1032 **Figure 3. Alix is recruited presynaptically during synaptic activation.** A) Western blot showing Alix  
 1033 expression during neuronal maturation in cortical cultures. PSD95 expression was used to monitor  
 1034 synaptogenesis with time in culture. B) Western blot showing increase of Alix in synaptosome-enriched  
 1035 neuronal membranes upon neuronal stimulation by bicuculline/4AP. Synaptophysin and PSD95 were  
 1036 used as pre- and postsynaptic markers, respectively. The phosphorylated form of ERK (p-ERK) was used  
 1037 to assess the efficiency of the stimulation. (n=4 experiments, Alix versus PSD95, p=0.0187, one-way  
 1038 ANOVA). C) Images from time-lapse video microscopy of 15 DIV hippocampal neurons expressing  
 1039 mCherry-Alix (mche-Alix) and synaptophysin-pHluorin (Syp-pH). White arrowheads indicate  
 1040 presynaptic boutons where Alix is recruited during a 5 min bicuculline/4AP stimulation starting at 2  
 1041 min (images at 2:20, 4 and 6 min) (scale bar: 10 μm). D) Profile of mche-Alix recruitment to presynaptic  
 1042 boutons 1 and 2 of figure 3C and the corresponding Syp-pH profile. Blue box indicates the  
 1043 bicuculline/4AP incubation. E, F) 15 DIV hippocampal neurons expressing Alix-YFP (green) stimulated  
 1044 for 5 min, fixed and presynaptic boutons revealed with anti-synapsin-1 antibody (Syn, magenta) (scale  
 1045 bar: 5 μm). Graph shows the presynaptic increase in Alix-YFP upon stimulation. Presynaptic Alix-YFP  
 1046 corresponds to the ratio of YFP fluorescence between synapsin-positive and -negative axonal regions  
 1047 (n=12 neurons per condition from 4 experiments, p=0.0017, Unpaired t test). G) 15 DIV hippocampal  
 1048 neurons expressing Alix-YFP (yellow), stimulated for 5 min, fixed and stained with anti-PSD95 (cyan)

1049 for postsynaptic densities and anti-synapsin-1 (magenta) (scale bar: 5  $\mu$ m).



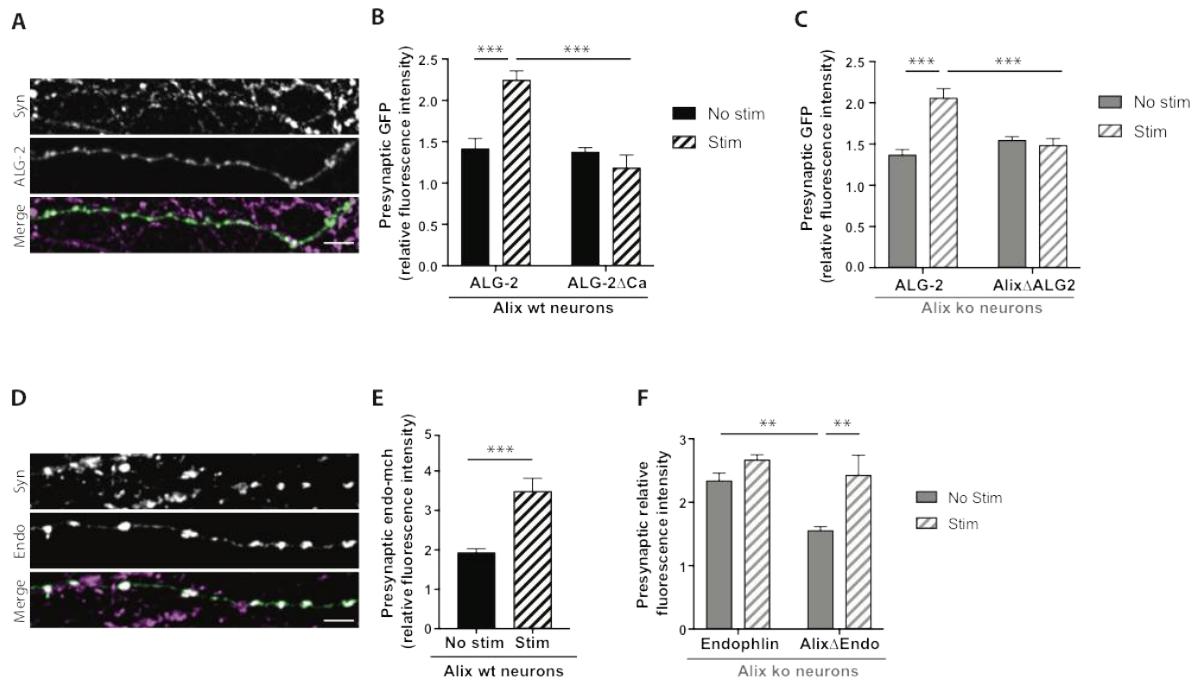

1050  
1051 **Figure 4. Interplay between Alix, ALG-2 and endophilin recruitments at activated synapses.** All  
1052 experiments made use of 15 DIV hippocampal neurons expressing the indicated constructs. Neurons  
1053 were stimulated with bicuculline/4AP for 5 min before fixation and staining with antisynapsin-1. A)  
1054 GFP-ALG-2 (green) is recruited presynaptically (scale bar: 5  $\mu$ m). B) Quantification of synaptic  
1055 recruitments of GFP-ALG-2 and GFP-ALG2 $\Delta$ Ca in Alix wt neurons shows that ALG-2 presynaptic increase  
1056 depends on its capacity to bind calcium (n=10 and n=7 neurons for GFP-ALG2 stimulated and not  
1057 stimulated, respectively and n=6 and n=12 neurons for GFP-ALG2 $\Delta$ Ca stimulated and not stimulated,  
1058 respectively, in 3 experiments, p=0.0001, one-way ANOVA). C) In Alix ko neurons GFP-ALG2 is recruited  
1059 pre-synaptically but GFP-Alix $\Delta$ ALG2 is not recruited indicating that Alix recruitment depends on its  
1060 capacity to bind ALG-2 (n=17 neurons for both GFP-ALG2 stimulated and not stimulated, and n=15 and  
1061 n=18 neurons for GFP-Alix $\Delta$ ALG2 stimulated and not stimulated, respectively, from at least 3  
1062 experiments, p=0.0001, one-way ANOVA). D, E) endophilin-mCherry (green) concentrates at  
1063 presynaptic parts of stimulated wt, but not Alix ko, neurons (scale bar: 5  $\mu$ m) (n=12 and n=10 neurons  
1064 for stimulated and not stimulated, respectively from 3 experiments, p=0.0001, Mann Whitney test). F)  
1065 Alix recruitment does not depend on its binding to endophilins as shown using GFP-Alix $\Delta$ Endo in Alix  
1066 ko neurons (n=15 and n=13 neurons for endophilin-mCherry stimulated and not stimulated,  
1067 respectively, and n=9 and n=10 neurons for GFP-Alix $\Delta$ Endo stimulated and not stimulated, respectively,  
1068 from 3 experiments p=0.0031, one-way ANOVA).  
1069

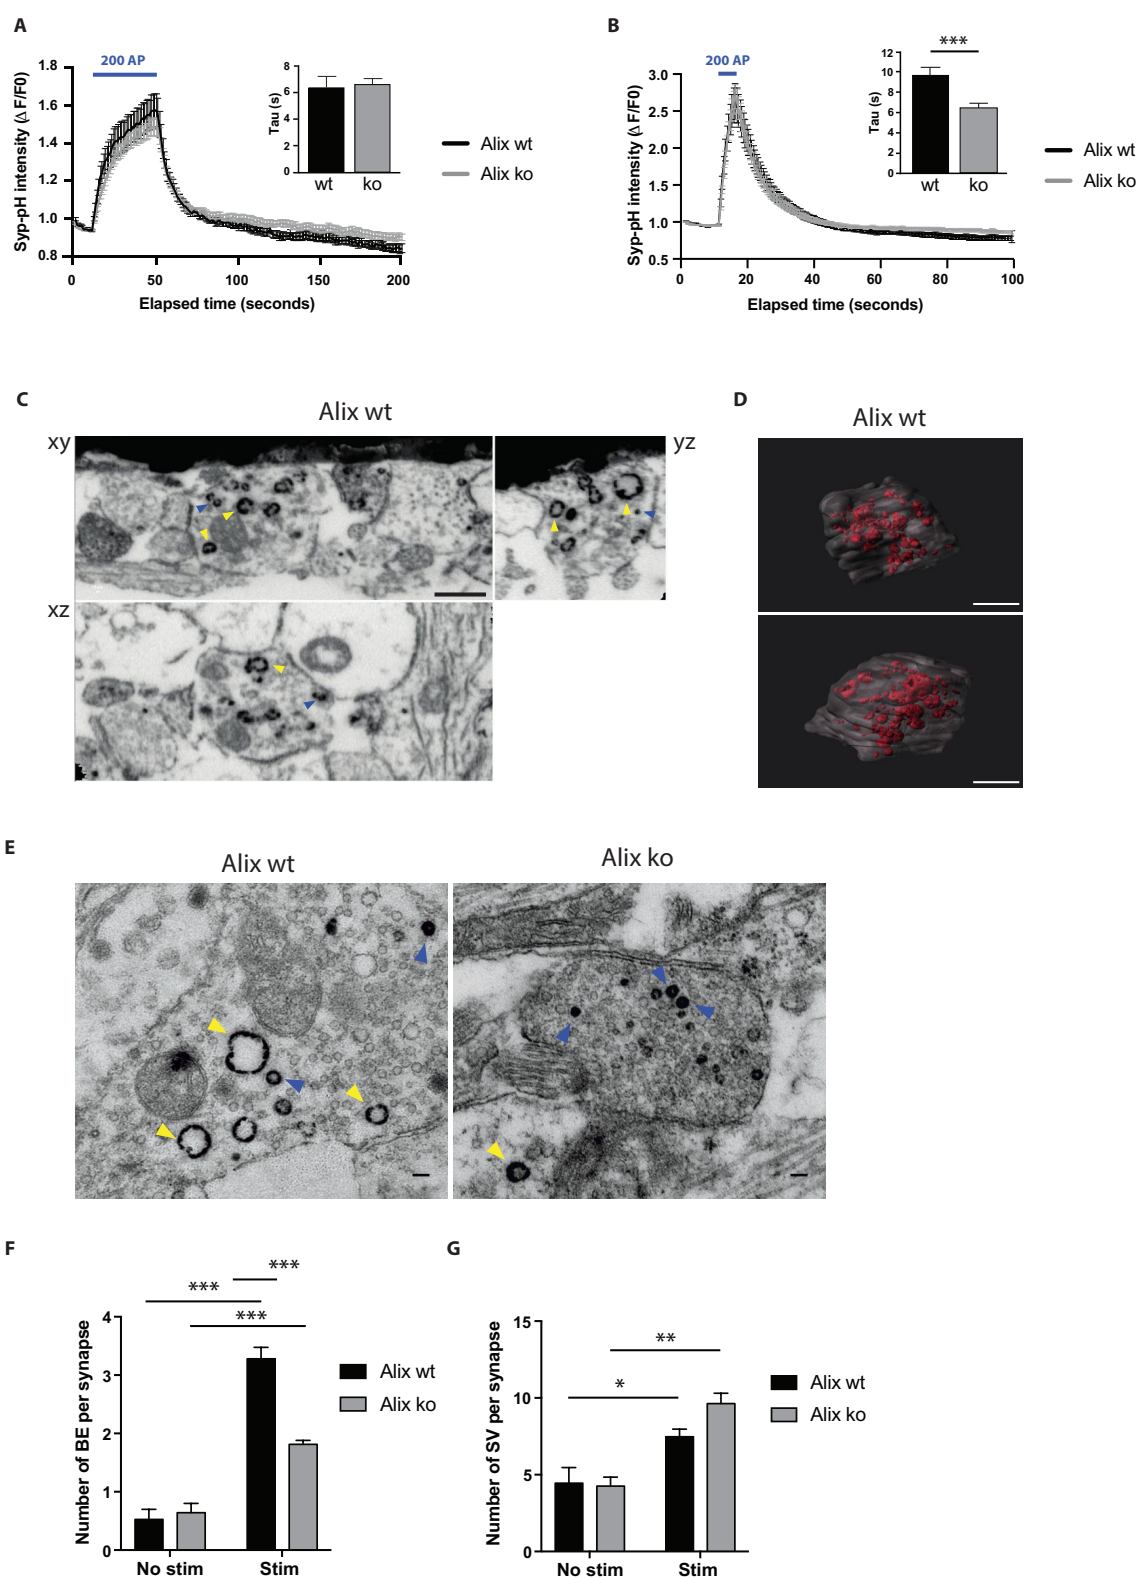

1070  
1071  
1072  
1073  
1074

**Figure 5. Alix is necessary for activity-dependent bulk endocytosis.** A, B) Average traces of Syp-pH fluorescence in synaptic boutons of Alix wt and ko hippocampal neurons stimulated with 200 action potentials (AP) applied at 5 Hz (A) or 40 Hz (B) (16-46 fields of view per condition from 4 experiments for wt and 5 for ko mice). Insets show the exponential fit of fluorescence decay after stimulations in



1075 the fields imaged. (A)  $p = 0.99$ ; (B)  $p = 0.001$  one-way ANOVA. C, E) Electron micrographs of cerebellar  
1076 granule neurons stimulated in presence of free HRP to label newly-formed synaptic vesicle (blue  
1077 arrowhead) and bulk endosomes (yellow arrowhead). C) Focused ion beam scanning electron  
1078 microscopy (FIB-SEM); orthogonal views from different planes (xy, xz or yz) extracted from a stack used  
1079 for the 3D reconstruction of WT pre-synaptic terminal shown in D). Scale bar: 500nm. D) Two different  
1080 views of the reconstructed synapse are shown where the membrane is represented in transparent  
1081 gray and HRP-positive structures in red (Scale bar: 500nm). E, F, G) transmission electron microscopy  
1082 of HRP incubated CB neurons was used to quantify the number of bulk endosomes (F) and synaptic  
1083 vesicles (G) in Alix wt and ko cerebellar neurons (F,  $n=4$  experiments,  $p=0.0008$ , one-way ANOVA) or  
1084 synaptic vesicles (G,  $n=4$  experiments,  $p=0.0393$  one-way ANOVA). (E, scale bar: 100 nm).  
1085

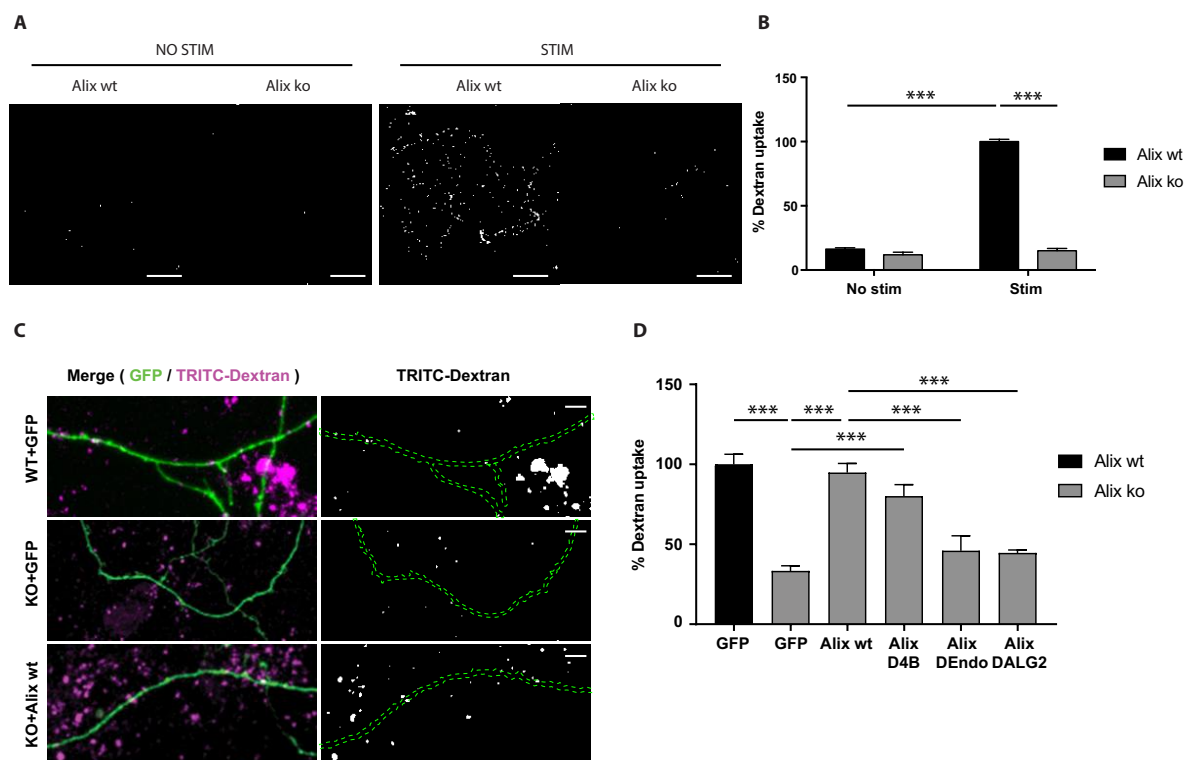

1086  
1087 **Figure 6. Alix binding to Alg-2 and endophilin but not CHMP4 is essential for bulk endocytosis.** A, B)  
1088 Dextran uptake is triggered by Bicuculline/4AP stimulation in Alix wt, but not in Alix ko, neurons.  
1089 Confocal images of Alix wt and Alix ko hippocampal neurons stimulated in the presence of 10kDa  
1090 dextran (scale bar: 50  $\mu$ m) (n=4 experiments, p=0.0001, one-way ANOVA). C) Representative images  
1091 of Dextran uptake by Alix wt neurons (top), Alix ko neurons expressing GFP (middle), or Alix ko neurons  
1092 expressing GFP and Alix (bottom). D) Dextran uptake is rescued in Alix ko neurons expressing Alix wt  
1093 and Alix $\Delta$ Chmp4B (Alix $\Delta$ 4B), but not Alix $\Delta$ ALG2 or Alix $\Delta$ endo. % of dextran uptake corresponds to the  
1094 number of dextran spots per  $\mu$ m expressed as percentages of the positive control for each experiment  
1095 (n=17 neurons for wt neurons, n=13 neurons for ko+GFP, n=11 for ko+Alix, n=12 neurons for  
1096 ko+Alix $\Delta$ endo, n=12 for ko+Alix $\Delta$ Chmp4B, and n=11 for ko+Alix $\Delta$ ALG2, all from at least 3 experiments,  
1097 p=0.0001, one-way ANOVA).

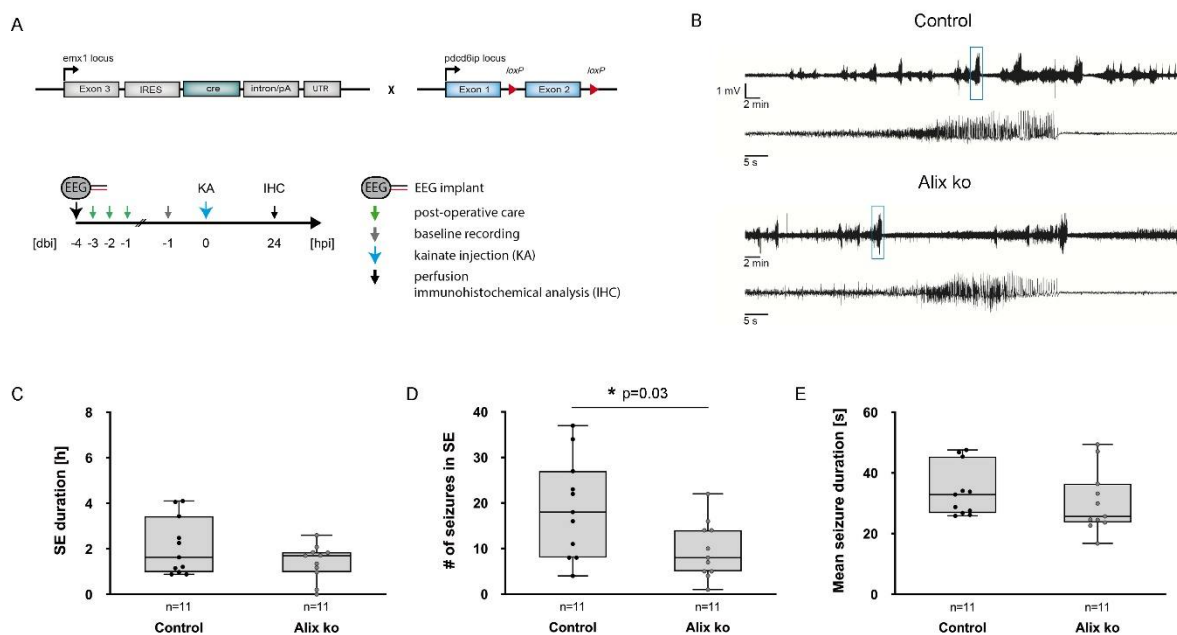

1098  
1099

1100 **Figure 7 Alix ko mice develop less seizures during status epilepticus.** A)  $Emx1^{IREScre}$  (Emx-Cre) and  
 1101  $Alix^{fl/fl}$  mouse lines were crossbred to delete Alix in neocortical and hippocampal excitatory neurons  
 1102 (Alix ko). Animals were implanted with telemetric EEG transmitters to assess seizure activity. EEG  
 1103 recording started one hour before *status epilepticus* (SE) induction via intracortical kainate (KA)  
 1104 injection and ended 24 hours post KA. Subsequently, the brains were processed for  
 1105 immunohistochemical staining. B) Representative EEG traces from Emx-Cre control and Alix ko animals.  
 1106 C) Total duration of SE did not differ between Alix ko and Emx-Cre control mice ( $p=0.49$ ). D) Alix ko  
 1107 animals experience about 66 % less seizures during SE than Emx-Cre controls ( $*p=0.03$ ). E) Mean  
 1108 seizure duration during SE was not affected in Alix ko mice compared to Emx-Cre controls ( $p=0.19$ ).  
 1109 N (control) = 11 animals, n (Alix ko) = 11 animals. Statistical analysis was performed with the Mann-  
 1110 Whitney test,  $*p<0.05$ .  
 1111

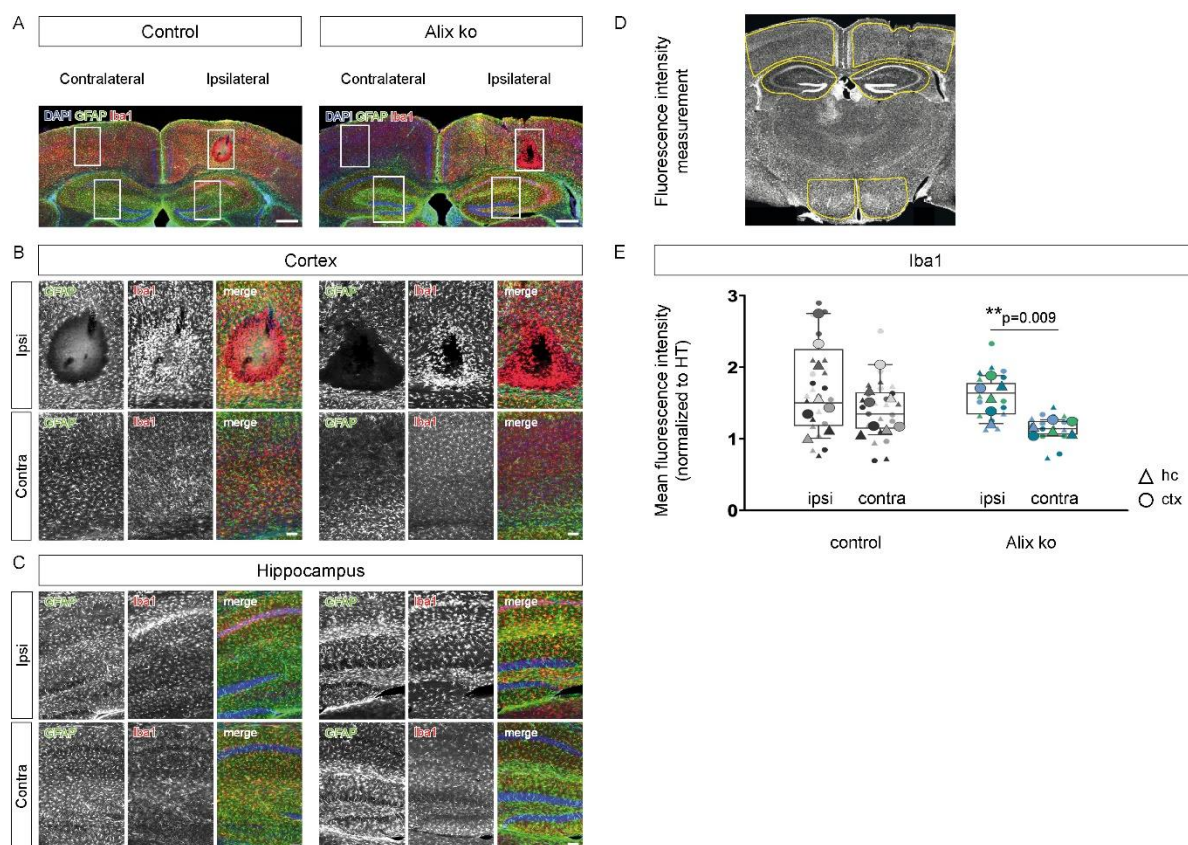

1112  
1113  
1114  
1115  
1116  
1117  
1118  
1119  
1120  
1121  
1122  
1123  
1124  
1125  
1126  
1127  
1128  
1129  
1130  
1131

**Figure 8 Reduced contralateral activation of microglia in Alix ko mice suggests reduced (contralateral) propagation of epileptiform activity.** A) Coronal overviews of brain slices 24Scale bar= 500  $\mu$ m. B) Magnification of highlighted cortical areas in (A) show an increased ipsilateral (ipsi) microglial activation (Iba1) compared to contralateral (contra), which was more pronounced in Alix ko mice. Astroglial reactivity (GFAP) was moderately increased adjacent to the injection site in both groups. Scale bar= 100  $\mu$ m. C) Magnification of highlighted hippocampal areas in (A). Contralateral hippocampi of Alix ko mice displayed reduced microglial activation (Iba1) relative to the ipsilateral side, which was less apparent in control mice. Astroglial reactivity (GFAP) was comparable in hippocampi of control and Alix ko mice. Scale bar= 100  $\mu$ m. D) Depiction of fluorescence intensity measurement areas in cortex, hippocampus and hypothalamus. E) In Alix ko mice, the contralateral Iba1 immunoreactivity was about 30 % reduced in comparison to ipsilateral (\*\*p= 0.009), in contrast to control mice (p= 0.645). Circles and triangles represent individual quantifications from cortex and hippocampus, respectively. One data point corresponds to the average of three slices from the same animal. Red and black symbols indicate ipsi- and contralateral sides. Fluorescence intensity values were normalized to the hypothalamic area (HT) of the respective hemisphere. N (control) = 4 animals, n (Alix ko) = 3 animals. Statistical analysis was performed on the average value of three slices per animal, with the Mann-Whitney test, \*p< 0.05, \*\*p <0.01.
